# Supplementary material for: Synthesis of Novel N-Heterocyclic Carbene-Ruthenium (II) Complexes, “Precious” Tools with Antibacterial, Anticancer and Antioxidant Properties
Source: MDPI journal article supplement (doi:10.3390/antibiotics12040693), 2023-04-01
Supplement: s1 [file s1]

## Supplementary Materials

# Synthesis of Novel *N*-Heterocyclic Carbene-Ruthenium (II) Complexes, “Precious” Tools with Antibacterial, Anticancer and Antioxidant Properties

Jessica Ceramella <sup>1,†</sup>, Rubina Troiano <sup>2,†</sup>, Domenico Iacopetta <sup>1</sup>, Annaluisa Mariconda <sup>3,\*</sup>, Michele Pellegrino <sup>1</sup>, Alessia Catalano <sup>4</sup>, Carmela Saturnino <sup>3</sup>, Stefano Aquaro <sup>1</sup>, Maria Stefania Sinicropi <sup>1,\*</sup> and Pasquale Longo <sup>2</sup>

<sup>1</sup> Department of Pharmacy, Health and Nutritional Sciences, University of Calabria, Via P. Bucci, 87036 Arcavacata di Rende, Italy; jessica.ceramella@unical.it (J.C.); domenico.iacopetta@unical.it (D.I.); michele.pellegrino@unical.it (M.P.); stefano.aquaro@unical.it (S.A.)

<sup>2</sup> Department of Chemistry and Biology, University of Salerno, Via Giovanni Paolo II, 132, 84084 Fisciano, Italy; rutroiano@unisa.it (R.T.); plongo@unisa.it (P.L.)

<sup>3</sup> Department of Science, University of Basilicata, Viale dell'Ateneo Lucano 10, 85100 Potenza, Italy; carmela.saturnino@unibas.it

<sup>4</sup> Department of Pharmacy-Drug Sciences, University of Bari “Aldo Moro”, 70126 Bari, Italy; alessia.catalano@uniba.it

\* Correspondence: annaluisa.mariconda@unibas.it (A.M.); s.sinicropi@unical.it (M.S.S.)

† These authors contributed equally to this work.

## List of Contents

|                                                                                |     |
|--------------------------------------------------------------------------------|-----|
| Characterization of <b>L1</b> .....                                            | S1  |
| Characterization of <b>L2</b> .....                                            | S4  |
| Characterization of <b>L3</b> .....                                            | S7  |
| Characterization of <b>RANHC-I</b> .....                                       | S10 |
| Characterization of <b>RANHC-V</b> .....                                       | S13 |
| Characterization of <b>RANHC-VI</b> .....                                      | S16 |
| Characterization of <b>RANHC-II</b> .....                                      | S19 |
| Characterization of <b>RANHC-III</b> .....                                     | S22 |
| Characterization of <b>RANHC-IV</b> .....                                      | S27 |
| Anticancer activity of the studied Ru-NHC complexes ( <b>RANHC-I-VI</b> )..... | S30 |
| MIC results of the Ru-NHC complexes ( <b>RANHC-I-VI</b> ).....                 | S30 |
| Radical scavenging ability against DPPH and ABTS radicals.....                 | S31 |

**$^1\text{H}$ -NMR N-Methyl, N'-(2-methoxy-2-phenyl)ethyl imidazolium iodide (L1)**

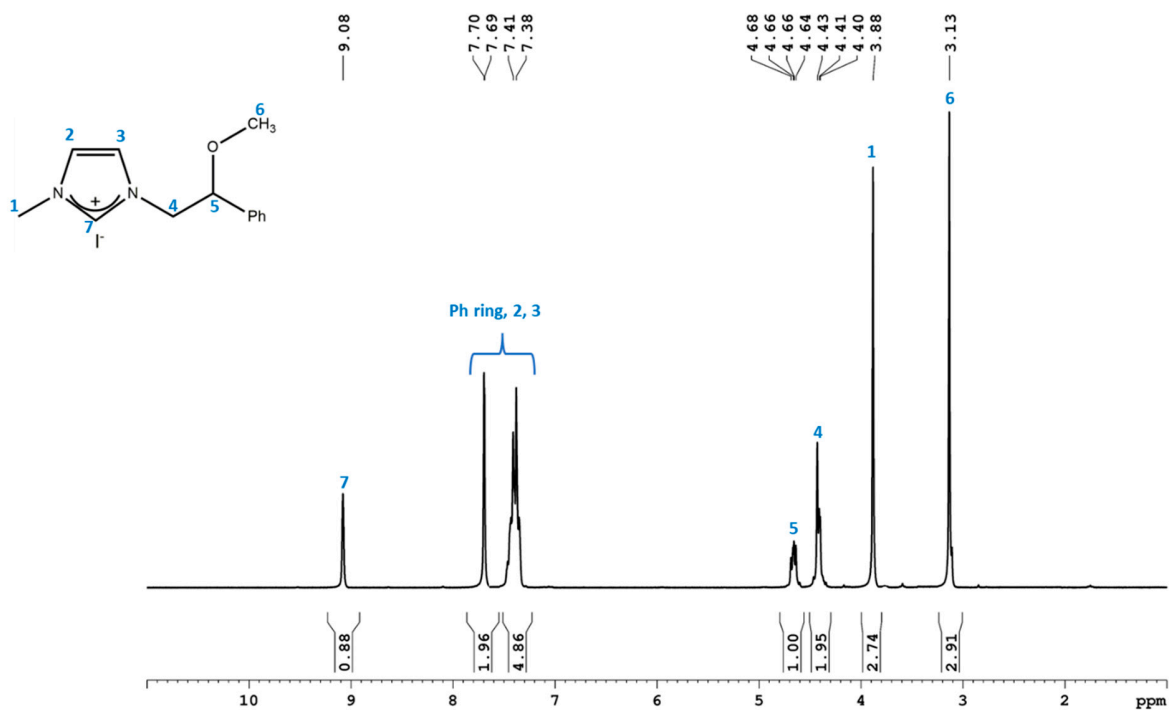

**Figure S1:**  $^1\text{H}$  NMR spectrum of N-Methyl, N'-(2-methoxy-2-phenyl)ethyl imidazolium iodide (L1).

$^1\text{H}$ -NMR (ppm, DMSO- $d_6$ , 250 MHz):  $\delta$  9.08 (s, NCHN, 1H), 7.70–7.38 (m, aromatic hydrogens and NCHCHN, 7H), 4.66 (m, CHOCH<sub>3</sub>, 1H), 4.41 (m, NCH<sub>2</sub>CHOCH<sub>3</sub>, 2H), 3.88 (s, NCH<sub>3</sub>, 3H), 3.13 (s, OCH<sub>3</sub>, 3H).

**$^{13}\text{C}$ -NMR N-Methyl, N'-(2-methoxy-2-phenyl)ethyl imidazolium iodide (L1)**

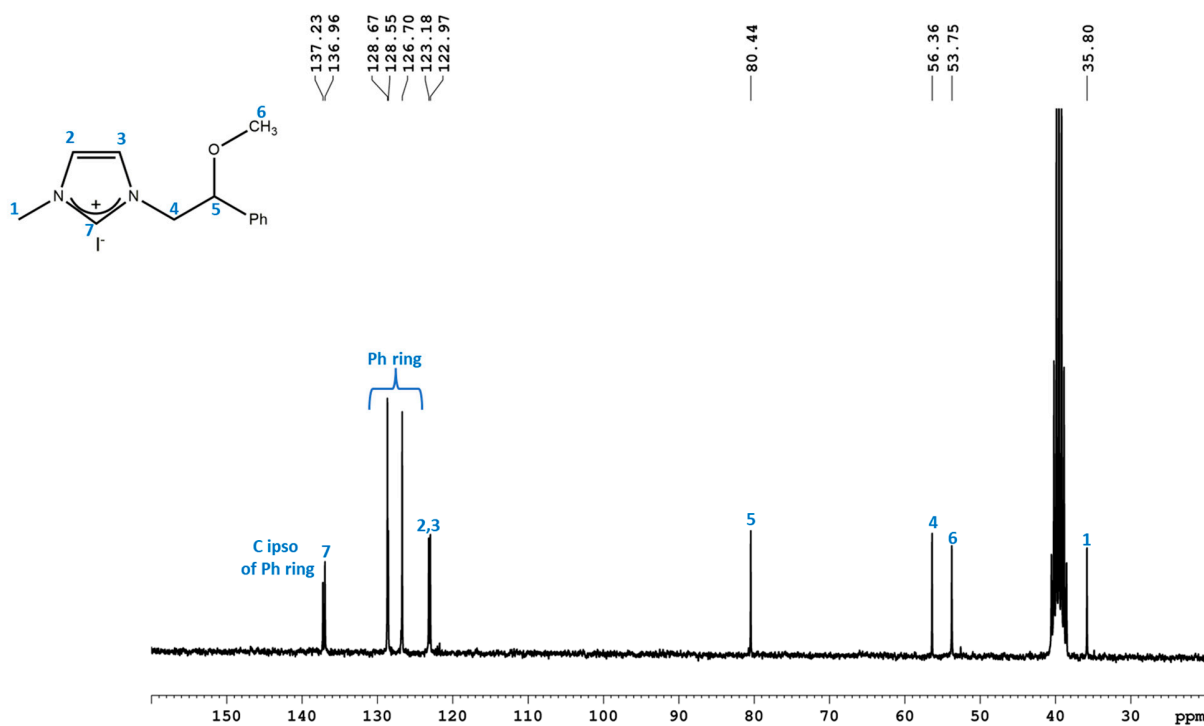

**Figure S2:**  $^{13}\text{C}$ -NMR spectrum of N-Methyl, N'-(2-methoxy-2-phenyl)ethyl imidazolium iodide (L1).

$^{13}\text{C}$ -NMR (ppm, DMSO- $d_6$ , 62.5 MHz):  $\delta$  137.23 (ipso carbon of aromatic ring), 136.96 (NCHN), 128.67, 128.55, 126.71 (aromatic carbons), 123.18, 122.97 (NCHCHN), 80.44 ( $\text{CHOCH}_3$ ), 56.36 ( $\text{NCH}_2\text{CHOCH}_3$ ), 53.75 ( $\text{OCH}_3$ ), 35.80 ( $\text{NCH}_3$ ).

**MALDI of N-Methyl, N'-(2-methoxy-2-phenyl)ethyl imidazolium iodide (L1)**

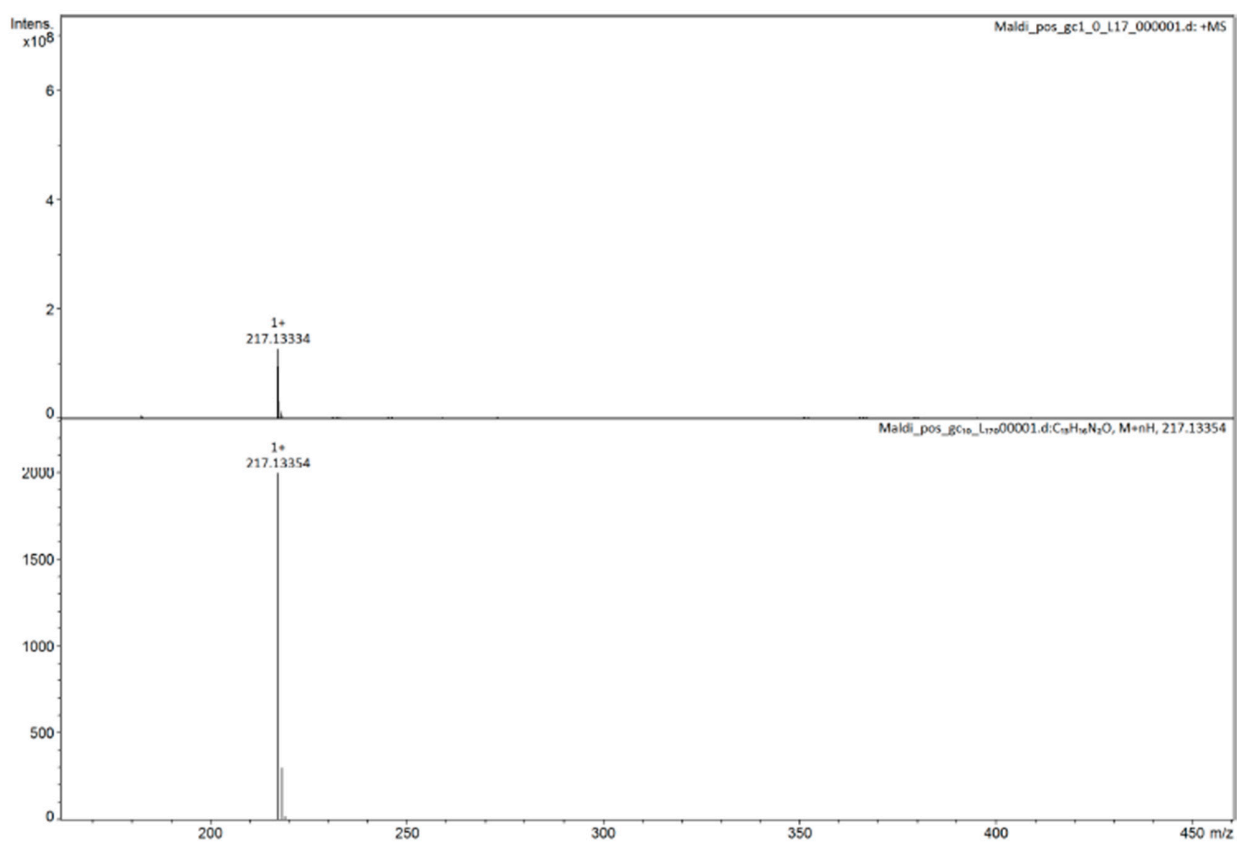

*Figure S3: MALDI of N-Methyl, N'-(2-methoxy-2-phenyl)ethyl imidazolium iodide (L1)*

**<sup>1</sup>H-NMR N-Methyl, N'-(2-methoxy-2-phenyl)ethyl- 4,5-dichloroimidazolium iodide (L2)**

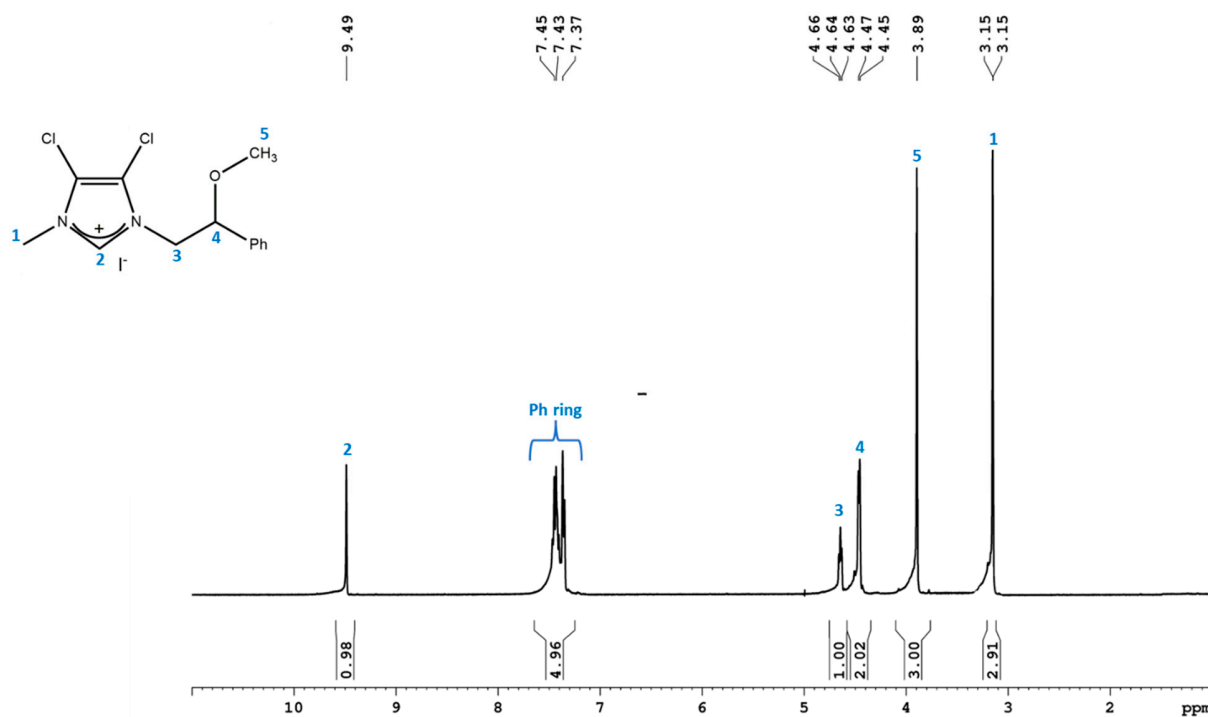

**Figure S4:** <sup>1</sup>H- NMR spectrum of N-Methyl, N'-(2-methoxy-2-phenyl)ethyl- 4,5-dichloroimidazolium iodide (L2)

<sup>1</sup>H-NMR (ppm, DMSO-d<sub>6</sub>, 400 MHz): δ 9.49 (s, NCHN, 1H), 7.45–7.37 (m, aromatic hydrogens, 5H), 4.64 (t, CHOCH<sub>3</sub>, 1H), 4.46 (m, NCH<sub>2</sub>CHOCH<sub>3</sub>, 2H), 3.89 (s, OCH<sub>3</sub>, 3H), 3.15 (s, NCH<sub>3</sub>, 3H).

<sup>13</sup>C-NMR N-Methyl, N'-(2-methoxy-2-phenyl)ethyl- 4,5-dichloroimidazolium iodide (L2)

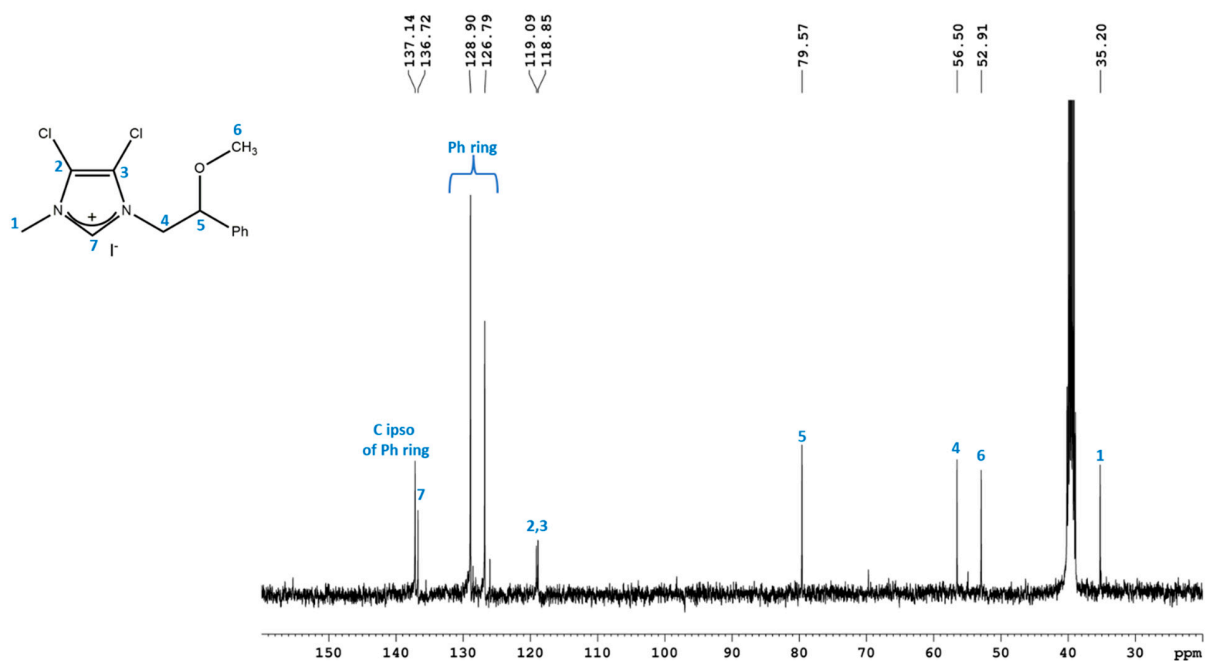

**Figures S5:** <sup>13</sup>C- NMR spectrum of N-Methyl, N'-(2-methoxy-2-phenyl)ethyl- 4,5-dichloro imidazolium iodide (L2)

<sup>13</sup>C-NMR (ppm, DMSO-d<sub>6</sub>, 100 MHz): δ 137.14 (ipso carbon of aromatic ring), 136.72 (NCHN), 128.90, 126.79, 126.00 (aromatic carbons), 119.09, 118.85 (NCHCHN), 79.57 (CHOCH<sub>3</sub>), 56.50 (NCH<sub>2</sub>CHOCH<sub>3</sub>), 52.91 (OCH<sub>3</sub>), 35.20 (NCH<sub>3</sub>).

**MALDI of N-Methyl, N'-(2-methoxy-2-phenyl)ethyl- 4,5-dichloroimidazolium iodide (L2)**

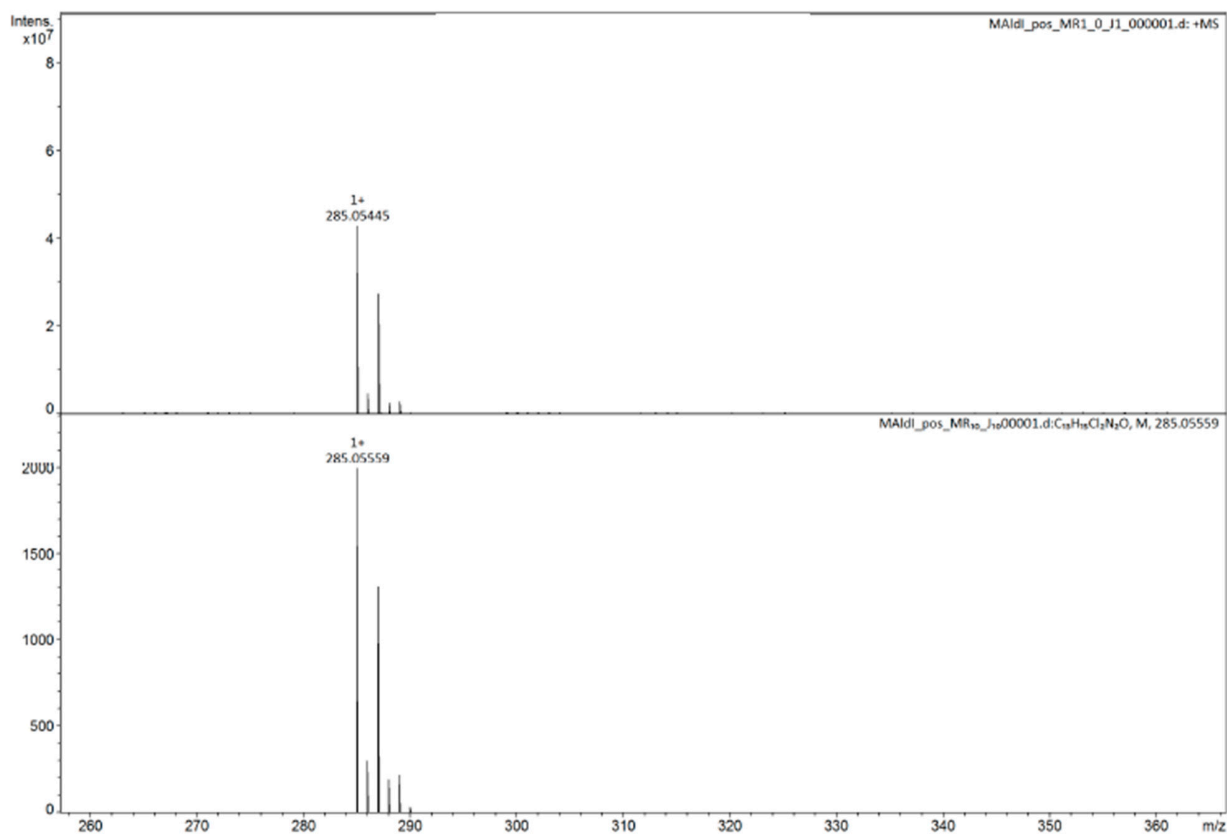

**Figure S6:** MALDI of N-Methyl, N'-(2-methoxy-2-phenyl)ethyl- 4,5-dichloroimidazolium iodide (L2)

**<sup>1</sup>H-NMR N-Methyl, N'-(2-methoxy-2-phenyl)ethyl-benzimidazolium iodide (L3)**

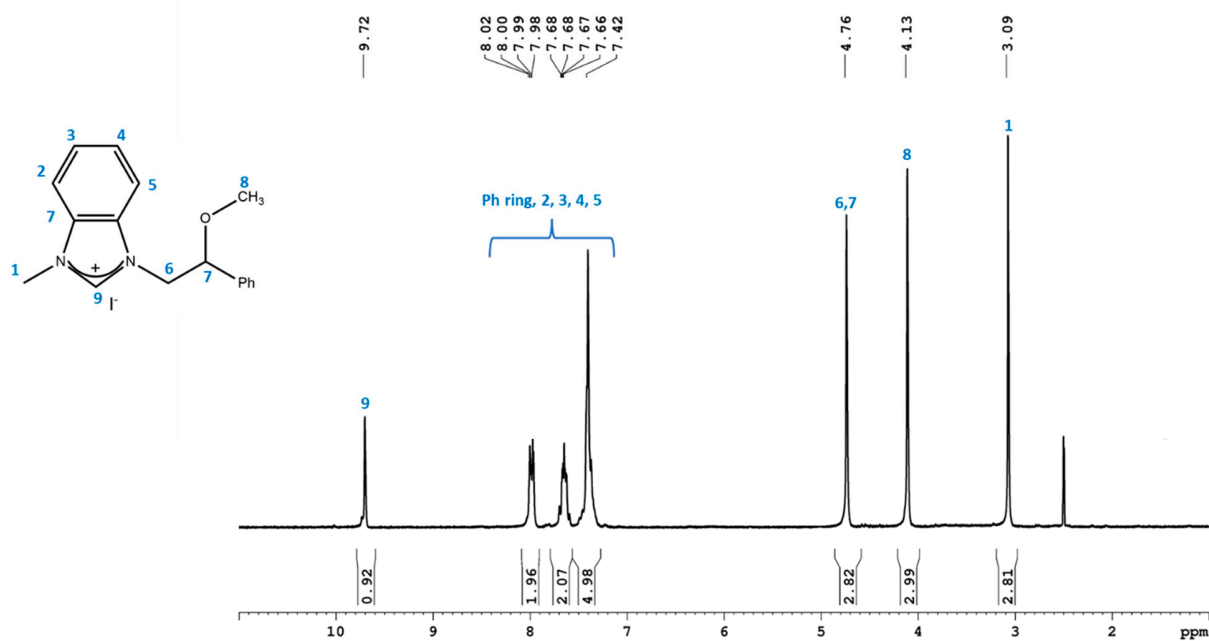

**Figure S7:** <sup>1</sup>H-NMR spectrum of N-Methyl, N'-(2-methoxy-2-phenyl)ethyl-benzimidazolium iodide (L3)

<sup>1</sup>H-NMR (ppm, DMSO-d<sub>6</sub>, 250 MHz): δ 9.72 (s, NCHN, 1H), 8.02–7.42 (m, aromatic hydrogens, 9H), 4.76 (o, CHOCH<sub>3</sub> and NCH<sub>2</sub>CHOCH<sub>3</sub>, 3H), 4.13 (s, OCH<sub>3</sub>, 3H), 3.09 (s, NCH<sub>3</sub>, 3H).



**$^{13}\text{C}$ -NMR N-Methyl, N'-(2-methoxy-2-phenyl)ethyl-benzoimidazolium iodide (L3)**

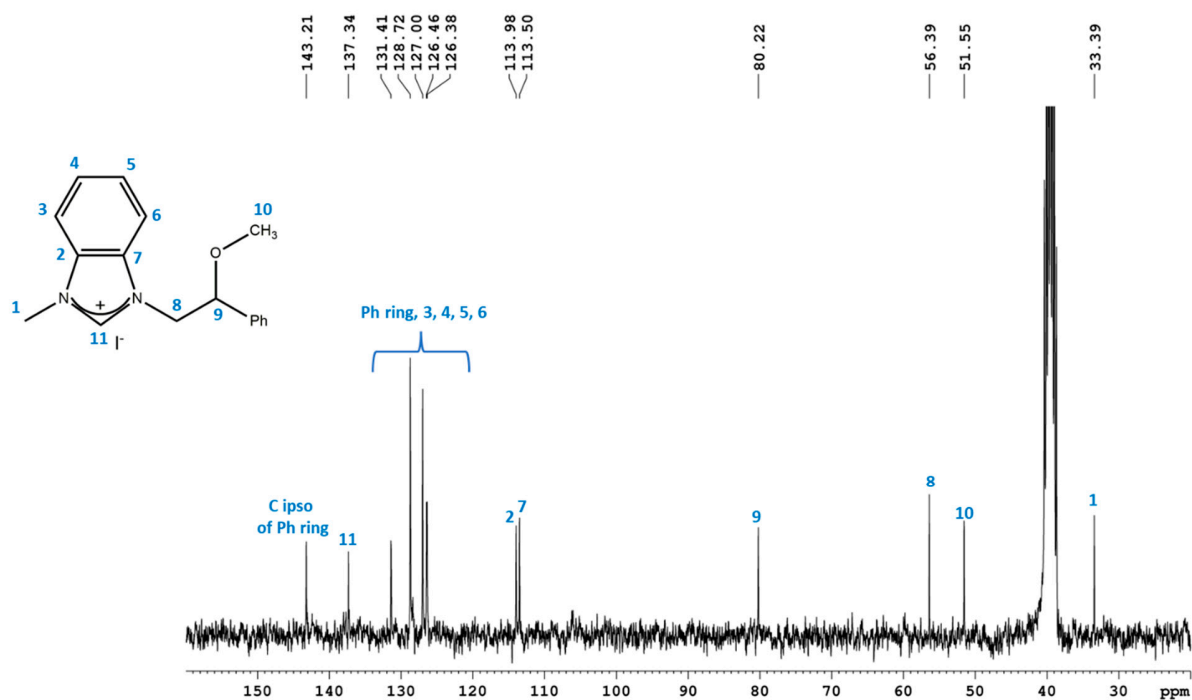

**Figure S8:**  $^{13}\text{C}$ -NMR spectrum of N-Methyl, N'-(2-methoxy-2-phenyl)ethyl-benzimidazolium iodide (L3)

$^{13}\text{C}$ -NMR (ppm, DMSO- $\text{d}_6$ , 75 MHz):  $\delta$  143.21 (ipso carbon of aromatic ring), 137.34 (NCHN), 131.41 128.72, 127.00, 126.46, 126.38, 113.98, 113.50 (aromatic carbons), 80.22 ( $\text{CHOCH}_3$ ), 56.39 ( $\text{NCH}_2\text{CHOCH}_3$ ), 51.55 ( $\text{OCH}_3$ ), 33.39 ( $\text{NCH}_3$ ).

**MALDI of N-Methyl, N'-(2-methoxy-2-phenyl)ethyl-benzimidazolium iodide (L3)**

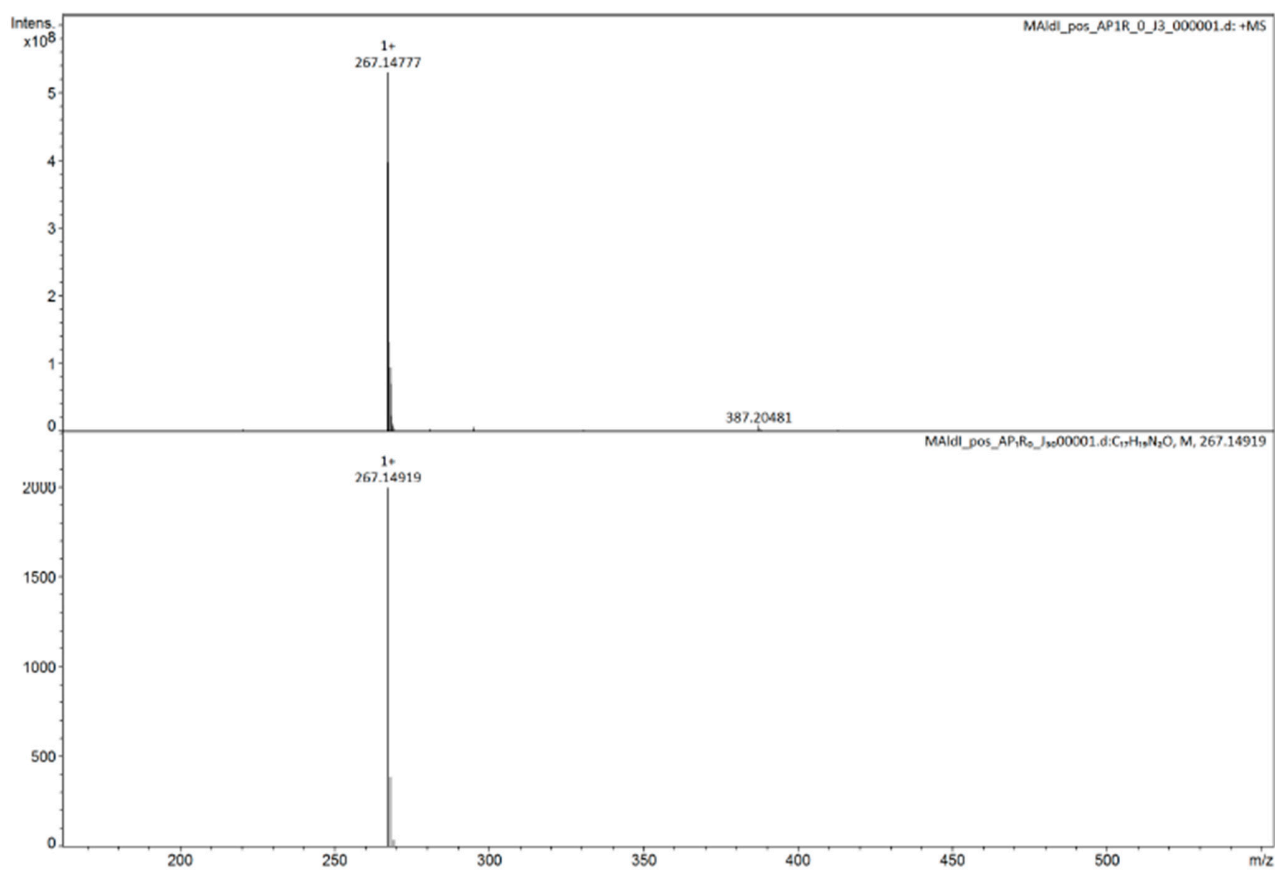

**Figure S9: MALDI of N-Methyl, N'-(2-methoxy-2-phenyl)ethyl-benzimidazolium iodide (L3)**

# <sup>1</sup>H-NMR RANHC-I

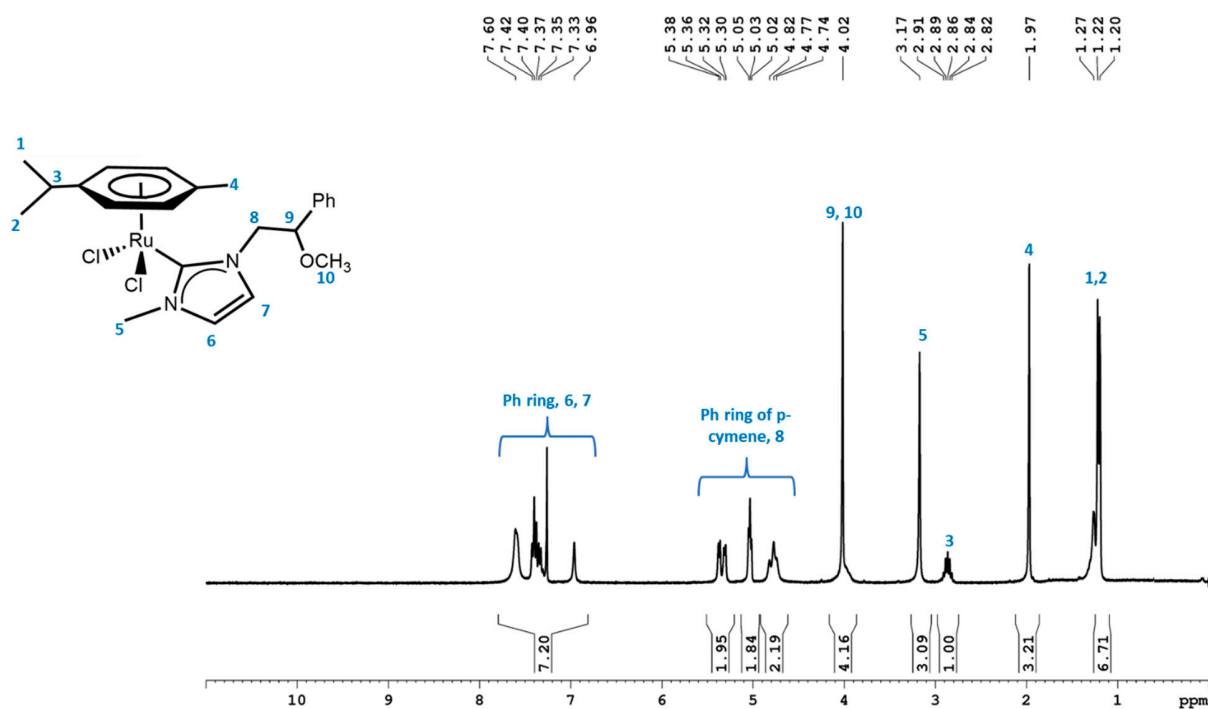

**Figure S10:** <sup>1</sup>H-NMR spectrum of RANHC-I

<sup>1</sup>H-NMR (ppm, CDCl<sub>3</sub>, 300 MHz): δ 7.60-6.96 (m, aromatic hydrogens and NCHCHN, 7H), 5.38-5.30 (dd, aromatic hydrogens of *p*-cymene, 2H), 5.03 (m, aromatic hydrogens of *p*-cymene, 2H), 4.77 (m, NCH<sub>2</sub>CHOCH<sub>3</sub>, 2H), 4.02 (o, OCH<sub>3</sub> and NCH<sub>2</sub>CHOCH<sub>3</sub>, 4H), 3.17 (s, NCH<sub>3</sub>, 3H), 2.86 (m, CH(CH<sub>3</sub>)<sub>2</sub> *p*-cymene, 1H), 1.97 (s, CH<sub>3</sub> *p*-cymene, 3H), 1.22 (m, CH(CH<sub>3</sub>)<sub>2</sub> *p*-cymene, 6H).

<sup>13</sup>C-NMR RANHC-I

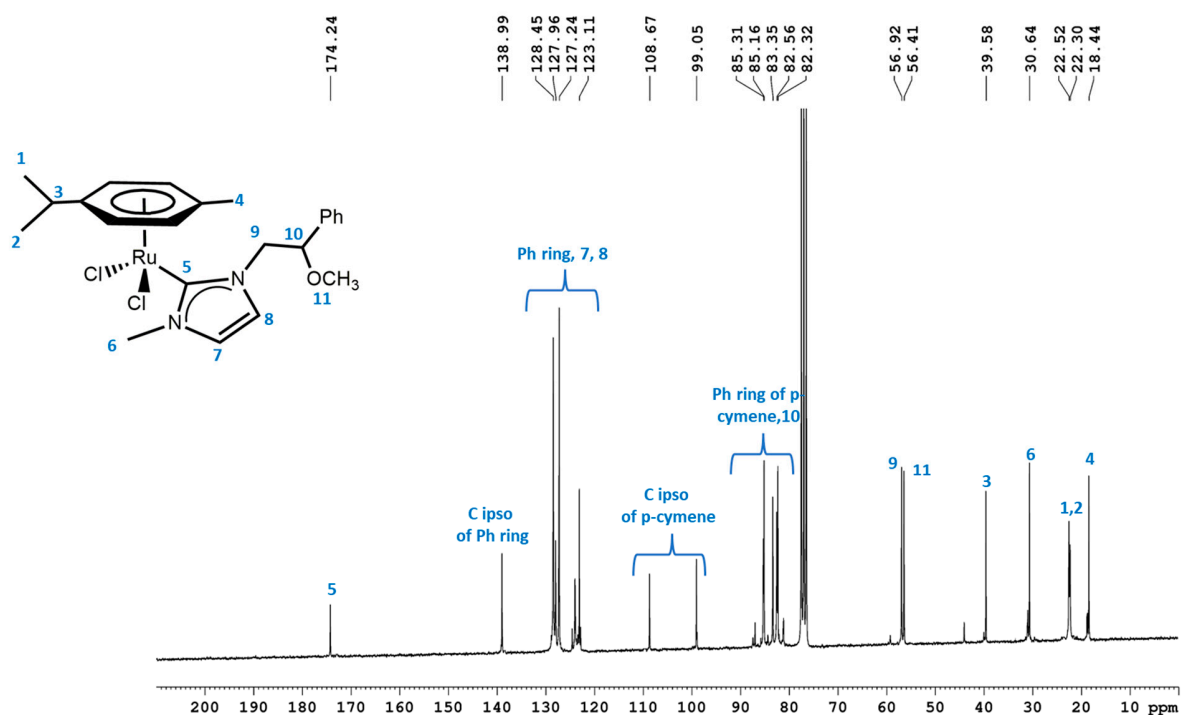

Figure S11: <sup>13</sup>C-NMR spectrum of RANHC-I

<sup>13</sup>C-NMR (ppm, CDCl<sub>3</sub>, 62.5 MHz): δ 174.24 (NCN), 138.99 (ipso carbon of aromatic ring), 128.45, 127.96, 127.24, 123.11 (aromatic carbons), 108.67, 99.05 (NCHCHN), 85.31, 85.16, 83.35, 82.56, 82.32 (aromatic carbon *p*-cymene, NCH<sub>2</sub>CH), 56.92 (NCH<sub>2</sub>CH), 56.41 (OCH<sub>3</sub>), 39.58 (CH(CH<sub>3</sub>)<sub>2</sub> *p*-cymene), 30.64 (NCH<sub>3</sub>), 22.52, 22.30 (CH(CH<sub>3</sub>)<sub>2</sub> *p*-cymene), 18.44 (CH<sub>3</sub> *p*-cymene).

## ESI of RANHC-I

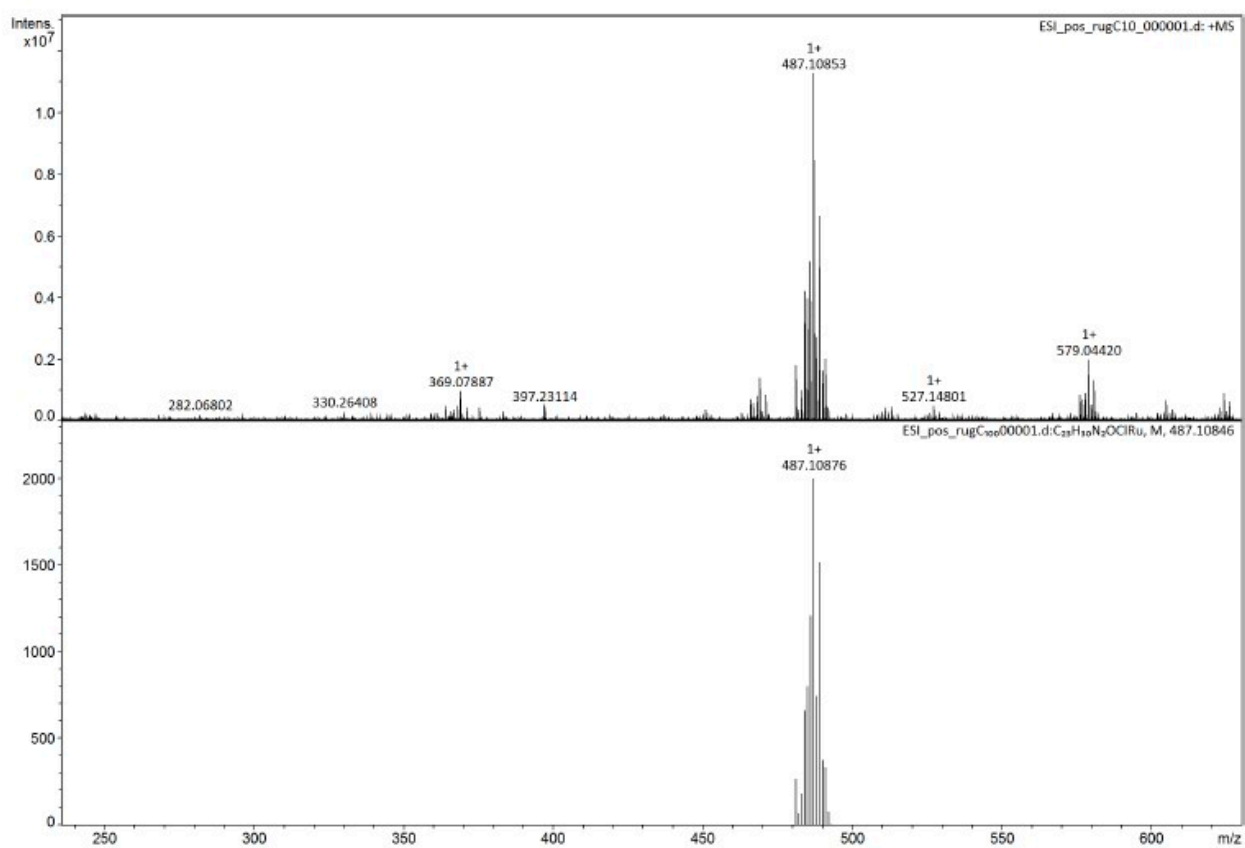

Figure S12: ESI of RANHC-I

# <sup>1</sup>H-NMR RANHC-V

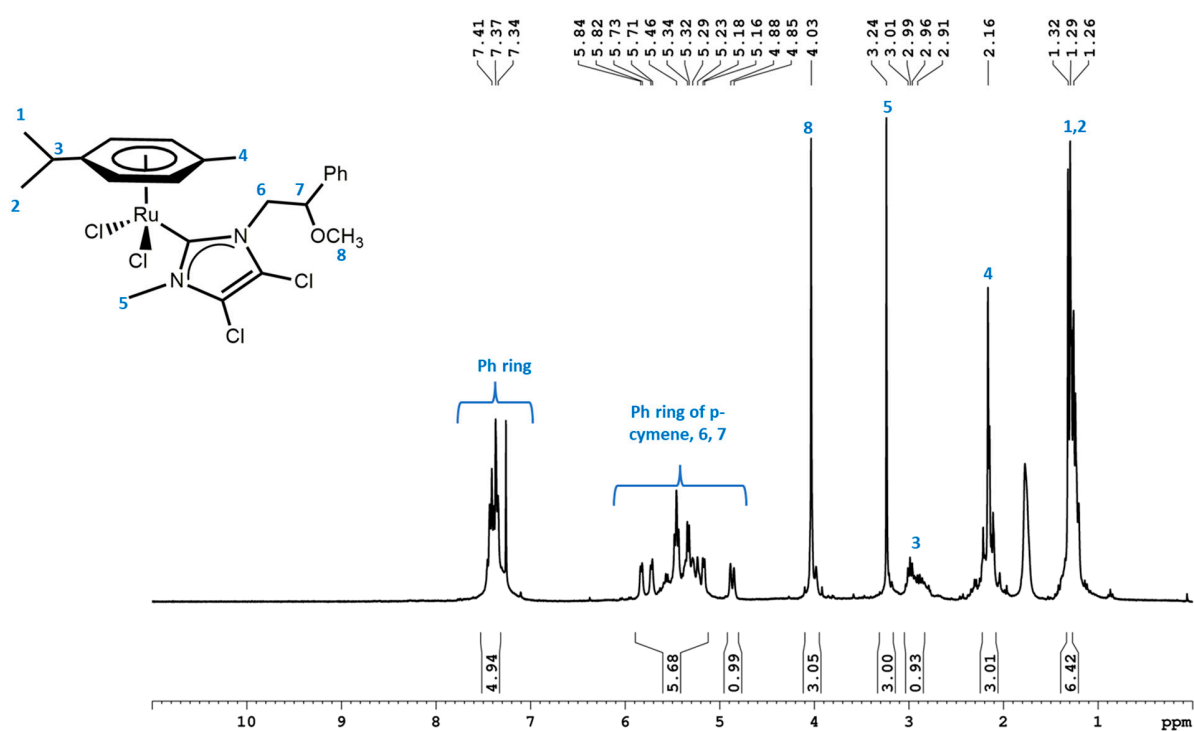

Figure S13: <sup>1</sup>H-NMR spectrum of RANHC-V

<sup>1</sup>H-NMR (ppm, CDCl<sub>3</sub>, 300 MHz): δ 7.41-7.34 (m, aromatic hydrogens, 5H), 5.84-4.85 (o, aromatic hydrogens *p*-cymene - NCH<sub>2</sub>CH - NCH<sub>2</sub>CH, 7H), 4.03 (s, OCH<sub>3</sub>, 3H), 3.24 (s, NCH<sub>3</sub>, 3H), 2.99 (CH(CH<sub>3</sub>)<sub>2</sub> *p*-cymene, 1H), 2.16 (s, CH<sub>3</sub> *p*-cymene, 3H), 1.29 (m, CH(CH<sub>3</sub>)<sub>2</sub> *p*-cymene, 6H).

# <sup>13</sup>C-NMR RANHC-V

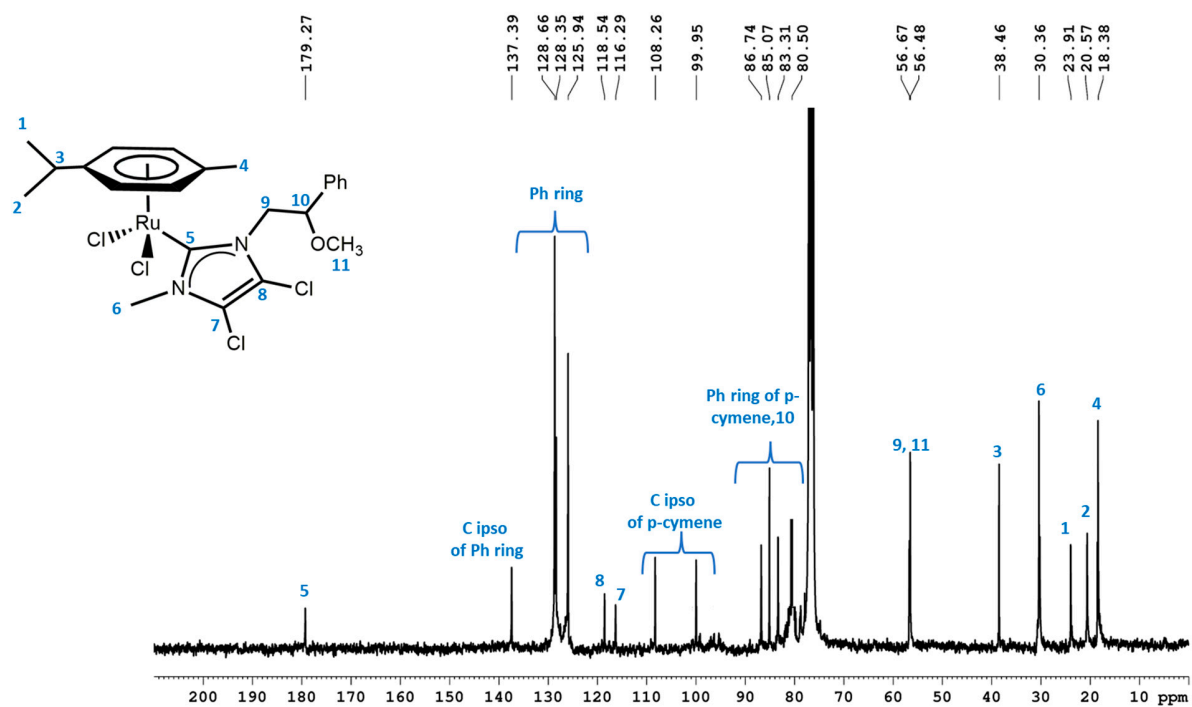

Figure S14: <sup>13</sup>C-NMR spectrum of RANHC-V

<sup>13</sup>C-NMR (ppm, CDCl<sub>3</sub>, 75 MHz): δ 179.27 (NCN), 137.39 (ipso carbon of aromatic ring), 128.66, 128.35, 125.94 (aromatic carbons), 118.54, 116.29 (NCHCHN), 108.26, 99.95, 86.74 (aromatic carbons *p*-cymene), 85.07 (NCH<sub>2</sub>CH), 83.31, 80.50 (aromatic carbons *p*-cymene), 56.67 (NCH<sub>2</sub>CH), 56.48 (OCH<sub>3</sub>), 38.46 (CH(CH<sub>3</sub>)<sub>2</sub> *p*-cymene), 30.36 (NCH<sub>3</sub>), 23.91, 20.57 (CH(CH<sub>3</sub>)<sub>2</sub> *p*-cymene), 18.38 (CH<sub>3</sub> *p*-cymene).

## ESI of RANHC-V

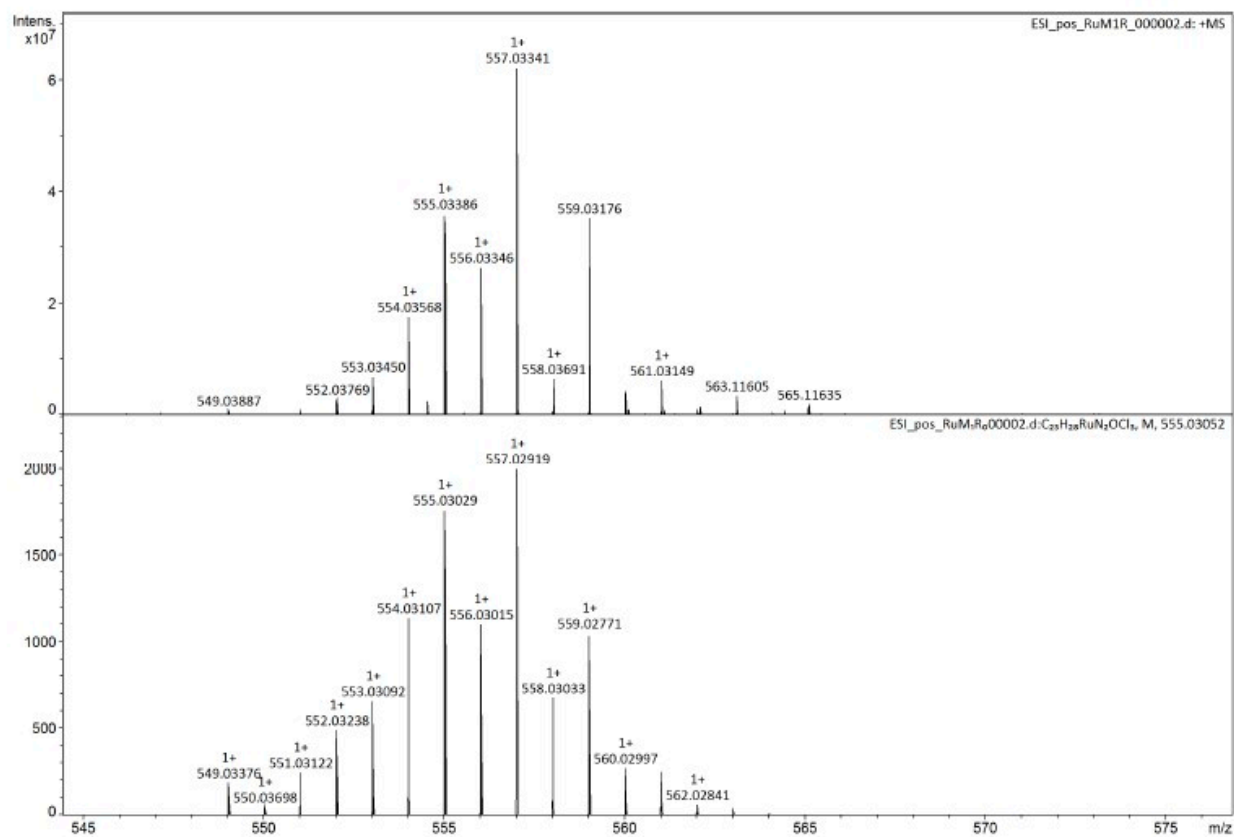

Figure S15: ESI of RANHC-V



# <sup>1</sup>H-NMR RANHC-VI

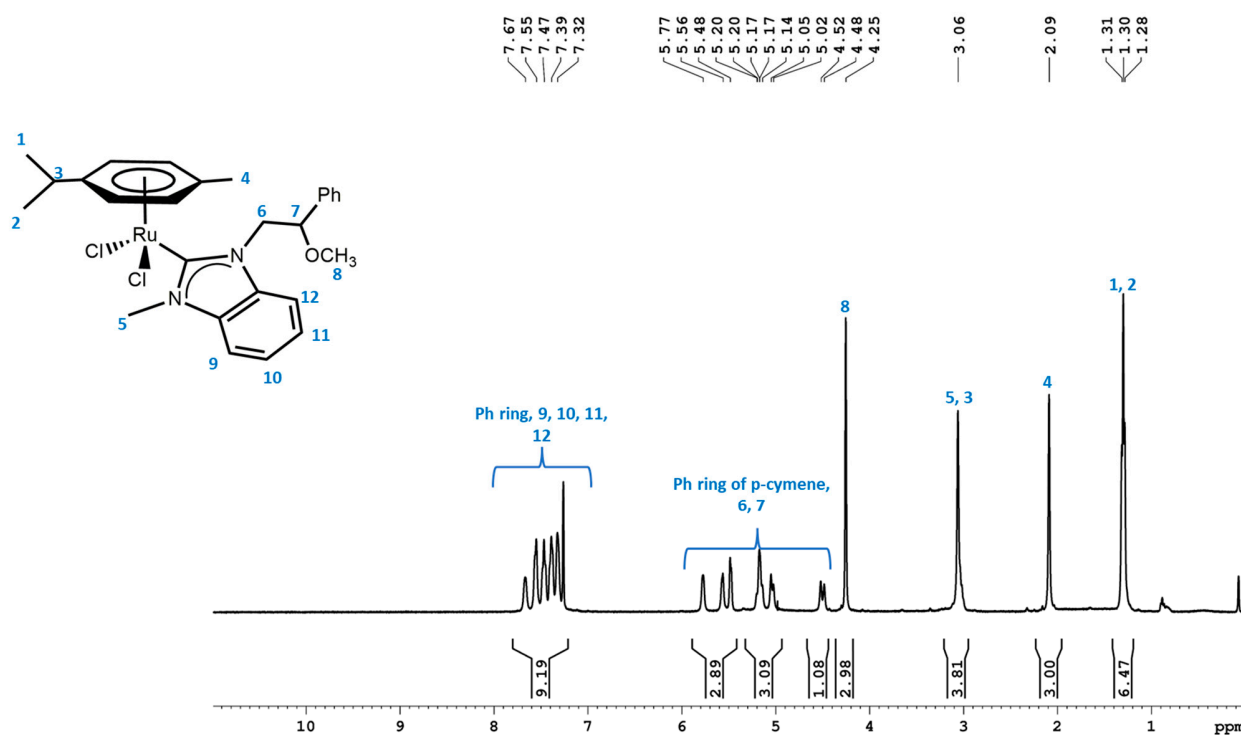

Figure S16: <sup>1</sup>H-NMR spectrum of RANHC-VI

<sup>1</sup>H-NMR (ppm, CDCl<sub>3</sub>, 400 MHz): δ 7.67-7.32 (m, hydrogens of aromatic rings, 9H), 5.77, 5.56 (br, aromatic hydrogens *p*-cymene, 2H), 5.48 (br, NCH<sub>2</sub>CH, 1H), 5.17 (m, NCH<sub>2</sub>CH, 2H), 5.05, 4.50 (d, hydrogens *p*-cymene, 2H), 4.25 (s, OCH<sub>3</sub>, 3H), 3.06 (o, NCH<sub>3</sub> and CH(CH<sub>3</sub>)<sub>2</sub> *p*-cymene, 4H), 2.09 (s, CH<sub>3</sub> *p*-cymene, 3H), 1.30 (m, CH(CH<sub>3</sub>)<sub>2</sub> *p*-cymene, 6H).

<sup>13</sup>C-NMR RANHC-VI

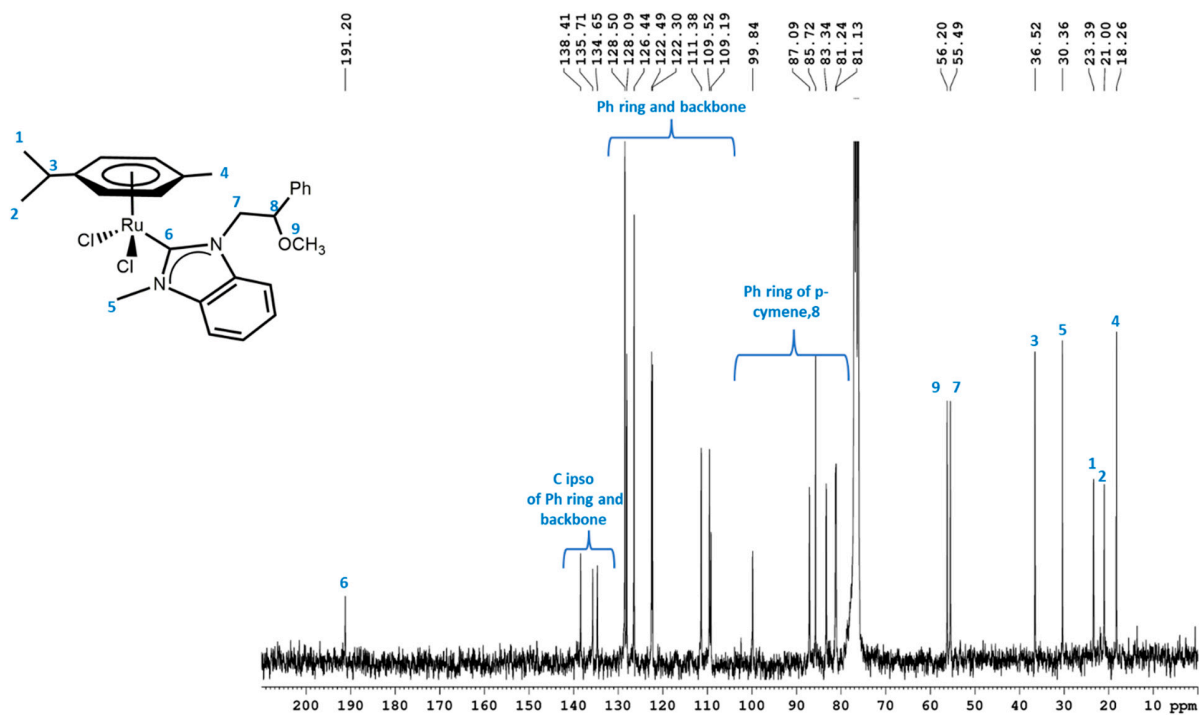

Figure S17: <sup>13</sup>C-NMR spectrum of RANHC-VI

<sup>13</sup>C-NMR (ppm, CDCl<sub>3</sub>, 75 MHz): δ 191.20 (NCN), 138.41 (ipso carbon of aromatic ring), 135.71, 134.65, 128.50, 128.09, 126.44, 122.49, 122.30, 111.38, 109.52 (aromatic carbons), 109.19, 99.84, 87.09, 85.72 (aromatic carbons *p*-cymene), 83.34 (NCH<sub>2</sub>CH), 81.24, 81.13 (aromatic carbons *p*-cymene), 56.20 (OCH<sub>3</sub>), 55.49 (NCH<sub>2</sub>CH), 36.52 (CH(CH<sub>3</sub>)<sub>2</sub> *p*-cymene), 30.36 (NCH<sub>3</sub>), 23.39, 21.00 (CH(CH<sub>3</sub>)<sub>2</sub> *p*-cymene), 18.26 (CH<sub>3</sub>, *p*-cymene).

## ESI of RANHC-VI

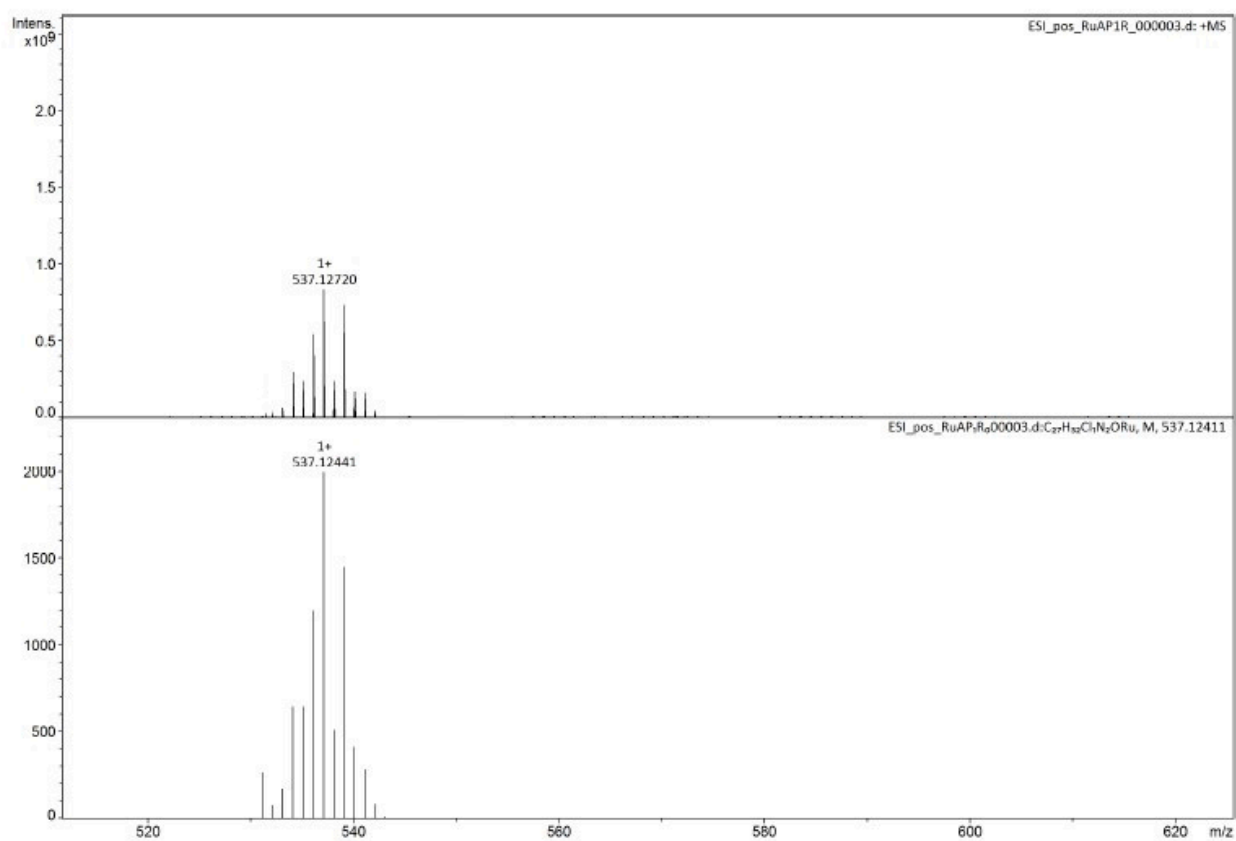

*Figure S3: ESI of RANHC VI*

## <sup>1</sup>H-NMR RANHC-II

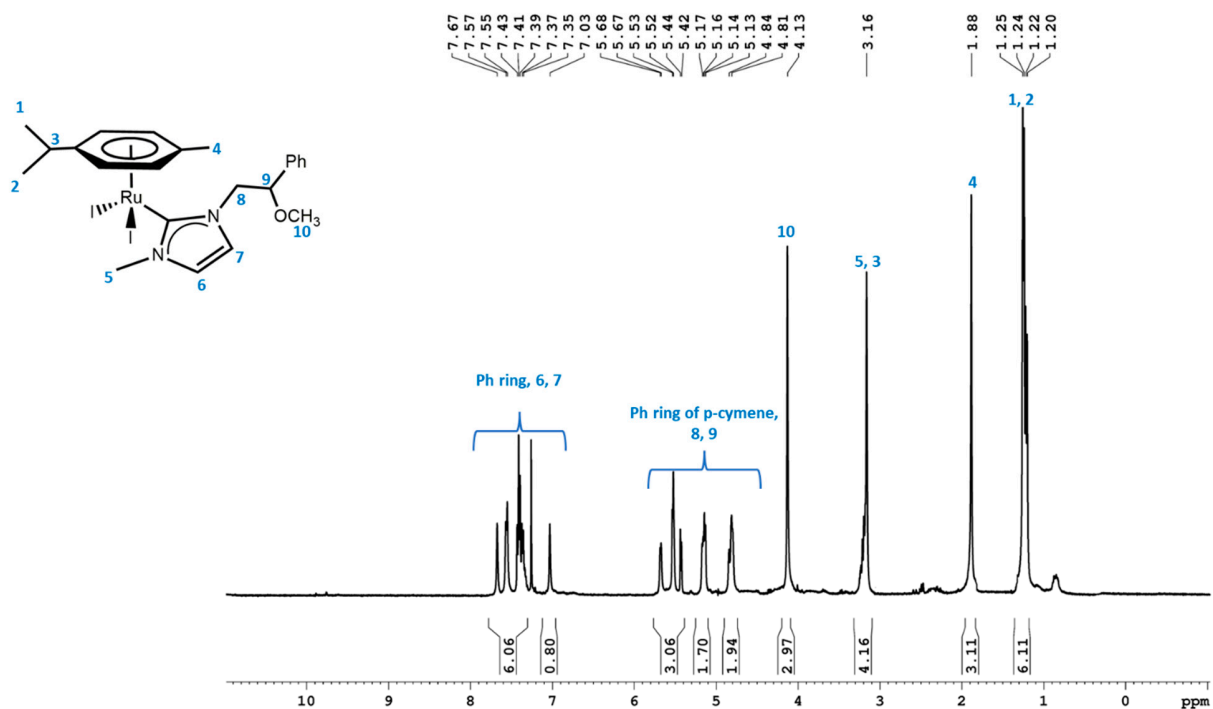

Figure S4: <sup>1</sup>H-NMR spectrum of RANHC-II

<sup>1</sup>H-NMR (ppm, CDCl<sub>3</sub>, 400 MHz): δ 7.67-7.03 (m, aromatic hydrogens and NCHCHN, 7H), 5.68-5.42 (br, aromatic hydrogens of *p*-cymene, 3H), 5.17 (o, aromatic hydrogens of *p*-cymene and NCH<sub>2</sub>CHOCH<sub>3</sub>, 2H), 4.81 (m, NCH<sub>2</sub>CHOCH<sub>3</sub>, 2H), 4.13 (s, OCH<sub>3</sub>, 3H), 3.16 (o, NCH<sub>3</sub> and CH(CH<sub>3</sub>)<sub>2</sub> *p*-cymene, 4H), 1.88 (s, CH<sub>3</sub> *p*-cymene, 3H), 1.22 (m, CH(CH<sub>3</sub>)<sub>2</sub> *p*-cymene, 6H).

## <sup>13</sup>C-NMR RANHC-II

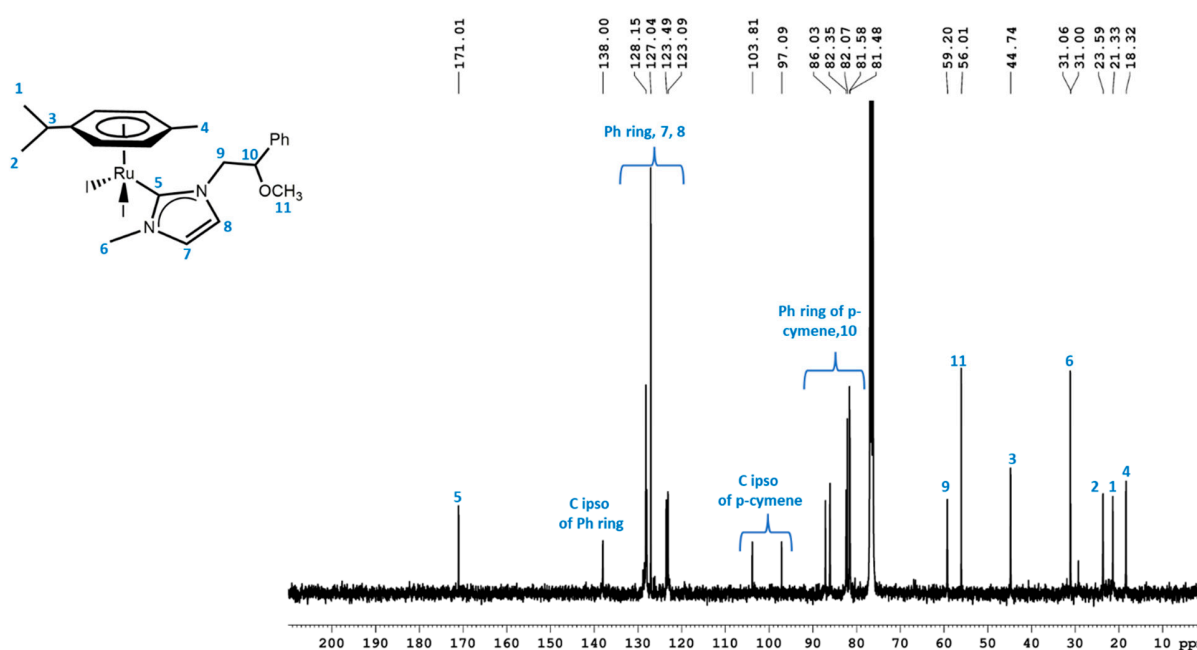

Figure S20: <sup>13</sup>C-NMR spectrum of RANHC-II

<sup>13</sup>C-NMR (ppm, CDCl<sub>3</sub>, 100 MHz): δ 171.01 (NCN), 138.00 (ipso carbon of aromatic ring), 128.15, 127.04 (aromatic carbons), 123.49, 123.09 (NCHCHN), 103.81, 97.09 (aromatic carbons *p*-cumene), 86.03 (NCH<sub>2</sub>CH), 82.35, 82.07, 81.58, 81.48 (aromatic carbons *p*-cymene), 59.20 (NCH<sub>2</sub>CH), 56.01 (OCH<sub>3</sub>), 44.74 (CH(CH<sub>3</sub>)<sub>2</sub> *p*-cymene), 31.06 (NCH<sub>3</sub>), 23.59, 21.33 (CH(CH<sub>3</sub>)<sub>2</sub> *p*-cymene), 18.32 (CH<sub>3</sub> *p*-cymene).

## ESI of RANHC-II

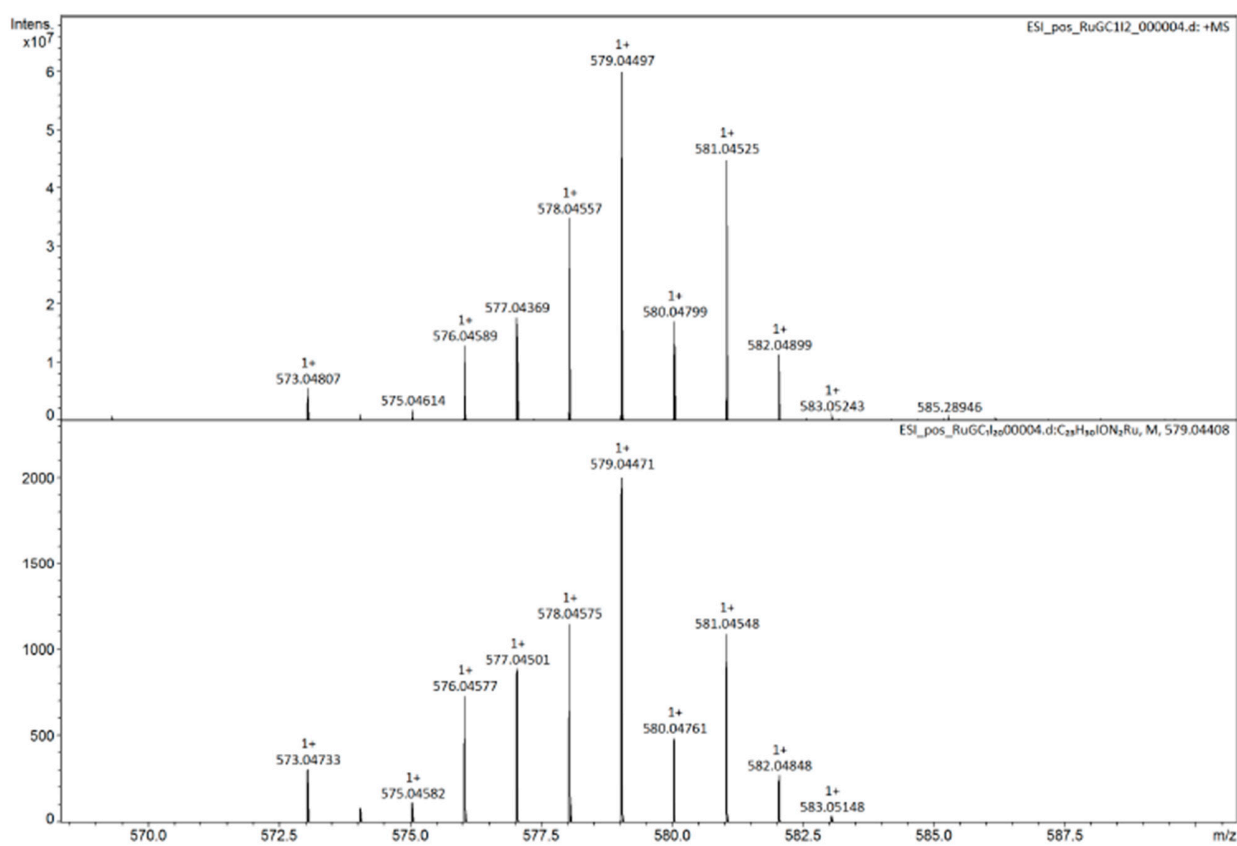

Figure S21: ESI of RANHC-II

# <sup>1</sup>H-NMR RANHC-III

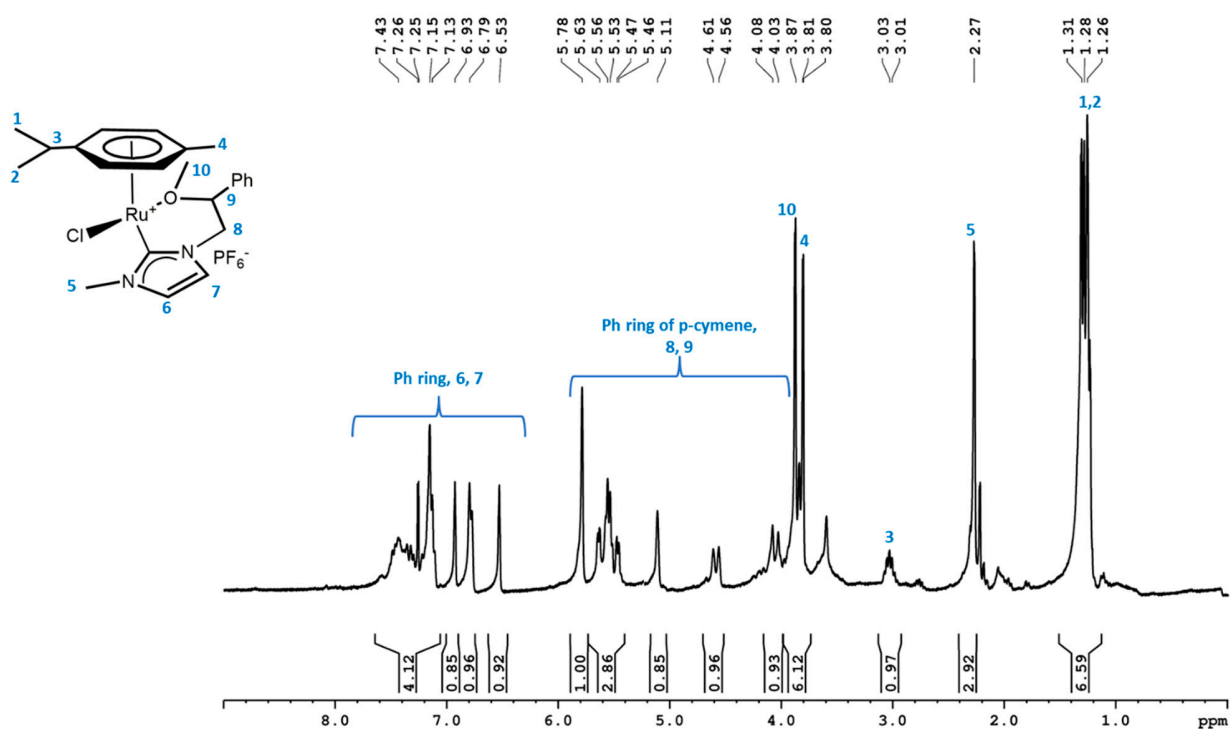

Figure S22: <sup>1</sup>H-NMR spectrum of RANHC-III

<sup>1</sup>H-NMR (ppm, CDCl<sub>3</sub>, 300 MHz): δ 7.43-6.53(m, aromatic hydrogens and NCHCHN, 7H), 5.78-4.08 (o, aromatic hydrogens of *p*-cymene - NCH<sub>2</sub>CHOCH<sub>3</sub> - NCH<sub>2</sub>CHOCH<sub>3</sub>, 7H), 3.87 (s, OCH<sub>3</sub>, 3H), 3.80 (s, CH<sub>3</sub> *p*-cymene, 3H), 3.02 (m, CH(CH<sub>3</sub>)<sub>2</sub> *p*-cymene, 4H), 2.27 (s, NCH<sub>3</sub>, 3H), 1.28 (m, CH(CH<sub>3</sub>)<sub>2</sub> *p*-cymene, 6H).

### <sup>13</sup>C-NMR RANHC-III

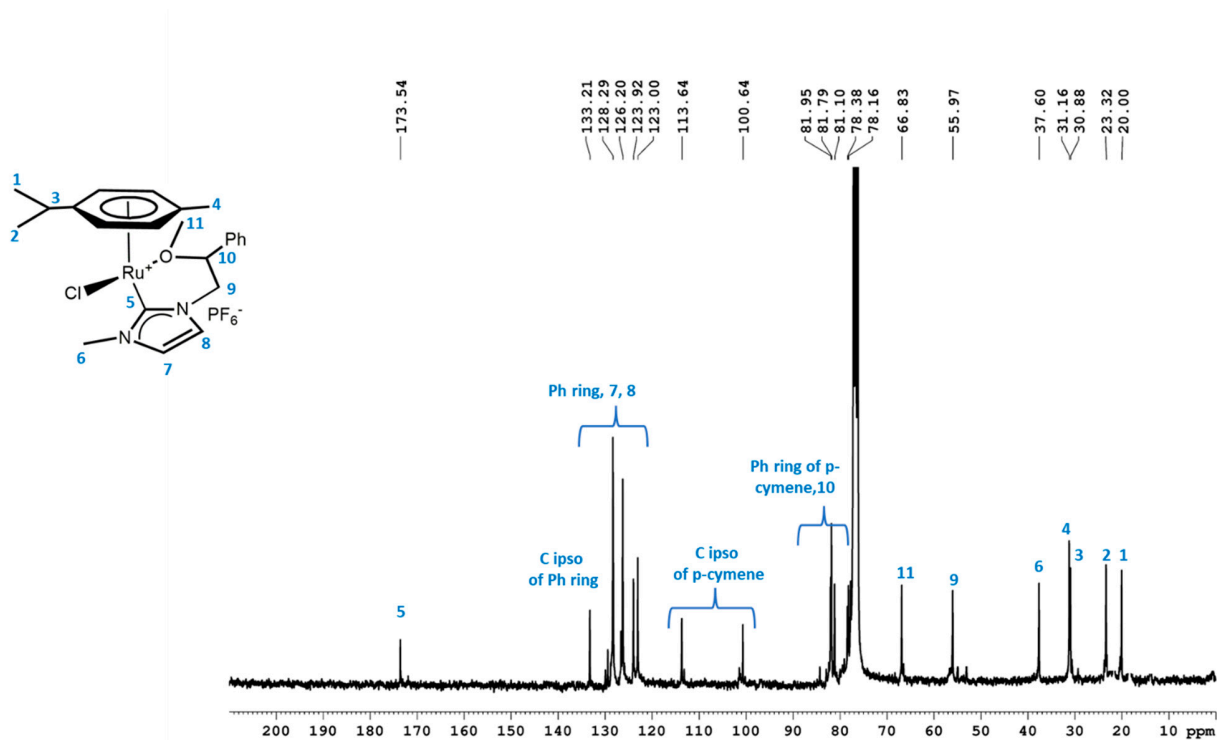

Figure S23: <sup>13</sup>C-NMR spectrum of RANHC-III

<sup>13</sup>C-NMR (ppm, CDCl<sub>3</sub>, 62.5 MHz): δ 173.54 (NCN), 133.21 (ipso carbon of aromatic ring), 128.29, 126.20 (aromatic carbons), 123.92, 123.00 (NCHCHN), 113.64, 100.64 (aromatic carbons *p*-cymene), 81.95 (aromatic carbon *p*-cymene), 81.79 (NCH<sub>2</sub>CH), 81.10, 78.38, 78.16 (aromatic carbon *p*-cymene), 66.83 (OCH<sub>3</sub>), 55.97 (NCH<sub>2</sub>CH), 37.60 (CH(CH<sub>3</sub>)<sub>2</sub> *p*-cymene), 31.16 (NCH<sub>3</sub>), 30.88 (CH<sub>3</sub> *p*-cymene), 23.32, 20.00 (CH(CH<sub>3</sub>)<sub>2</sub> *p*-cymene).



**$^{31}\text{P}$ -NMR RANHC-III**

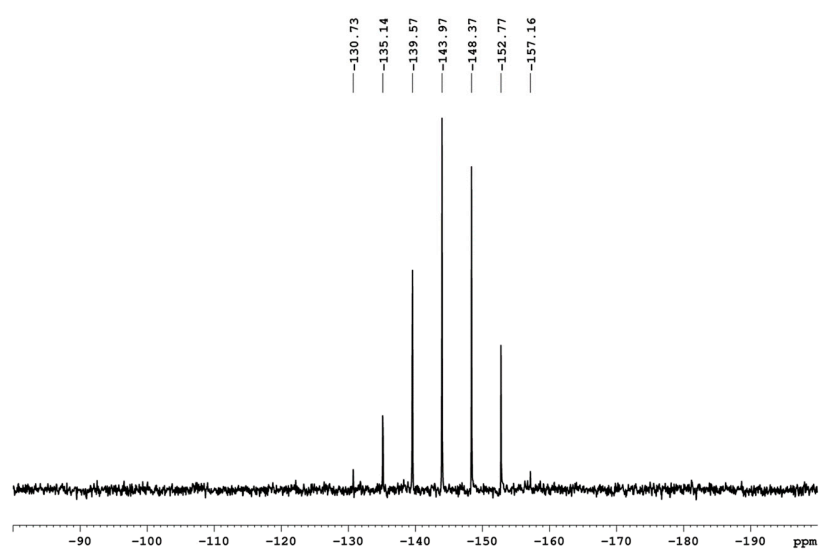

**Figure S24:**  $^{31}\text{P}$ -NMR spectrum of RANHC-III

$^{31}\text{P}$ -NMR (ppm,  $\text{CDCl}_3$ , 161.97 MHz):  $\delta$  -143.97 (m)

**$^{19}\text{F}$ -NMR RANHC-III**

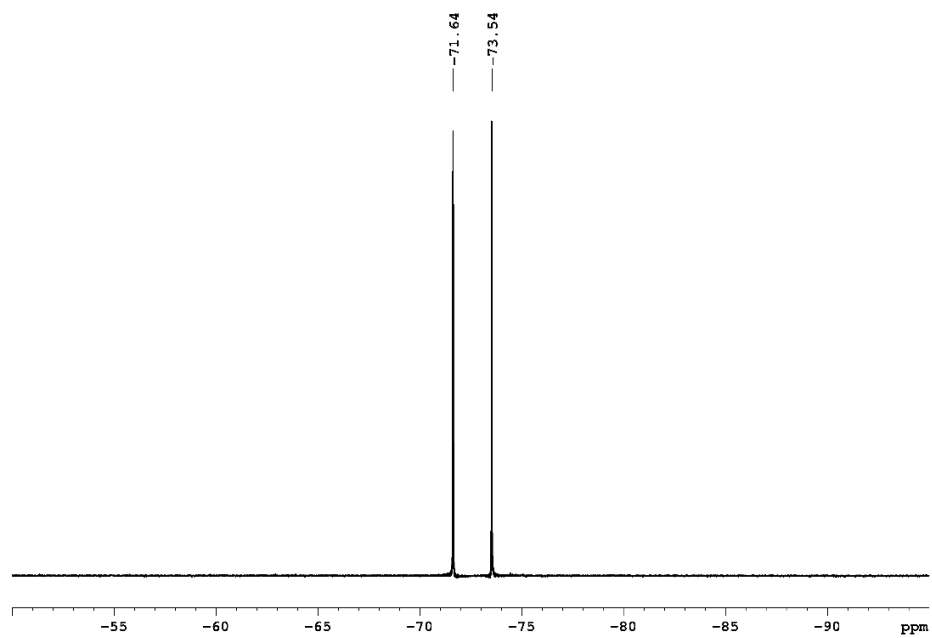

*Figure S25:  $^{19}\text{F}$ -NMR spectrum of RANHC-III*

$^{19}\text{F}$ -NMR (ppm,  $\text{CDCl}_3$ , 376 MHz):  $\delta$  -71.64, -73.54.

## ESI of RANHC-III

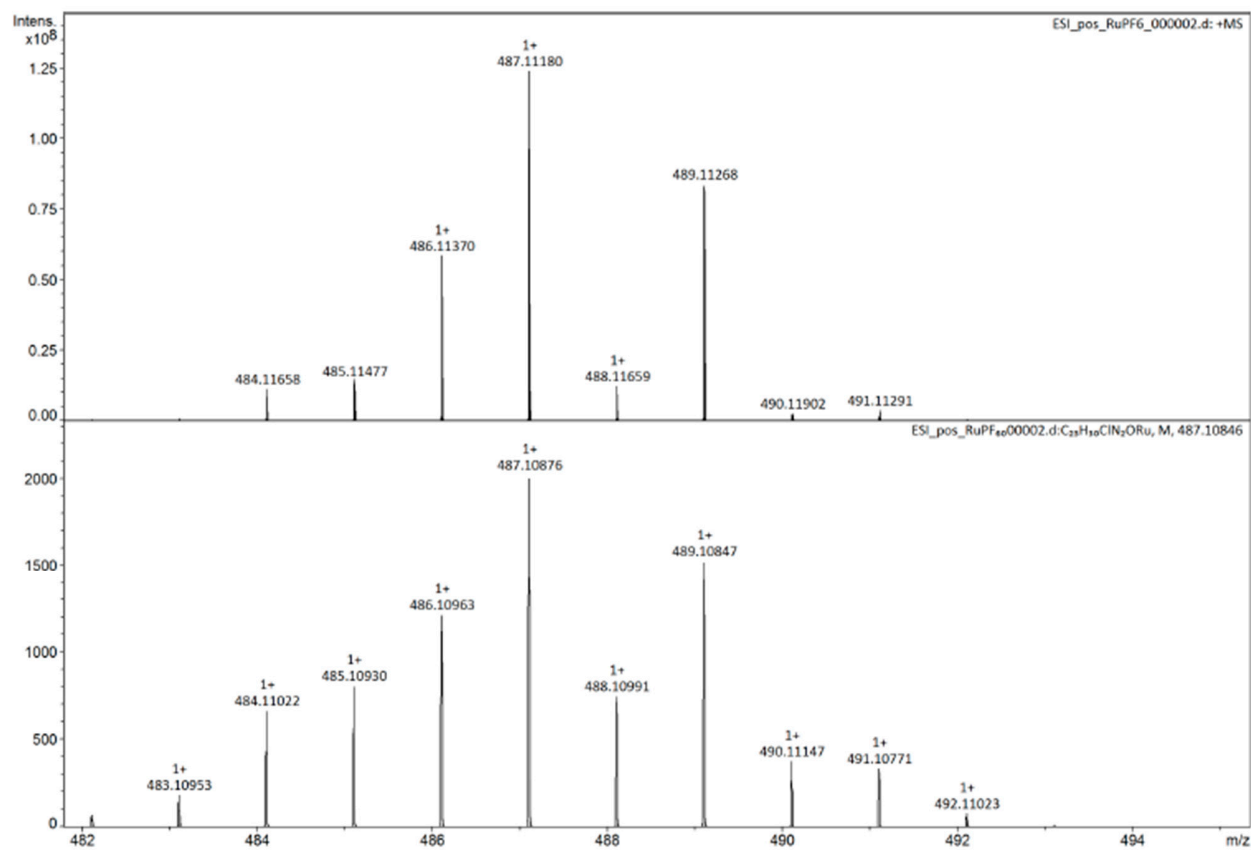

Figure S26: ESI of RANHC-III

# <sup>1</sup>H-NMR RANHC-IV

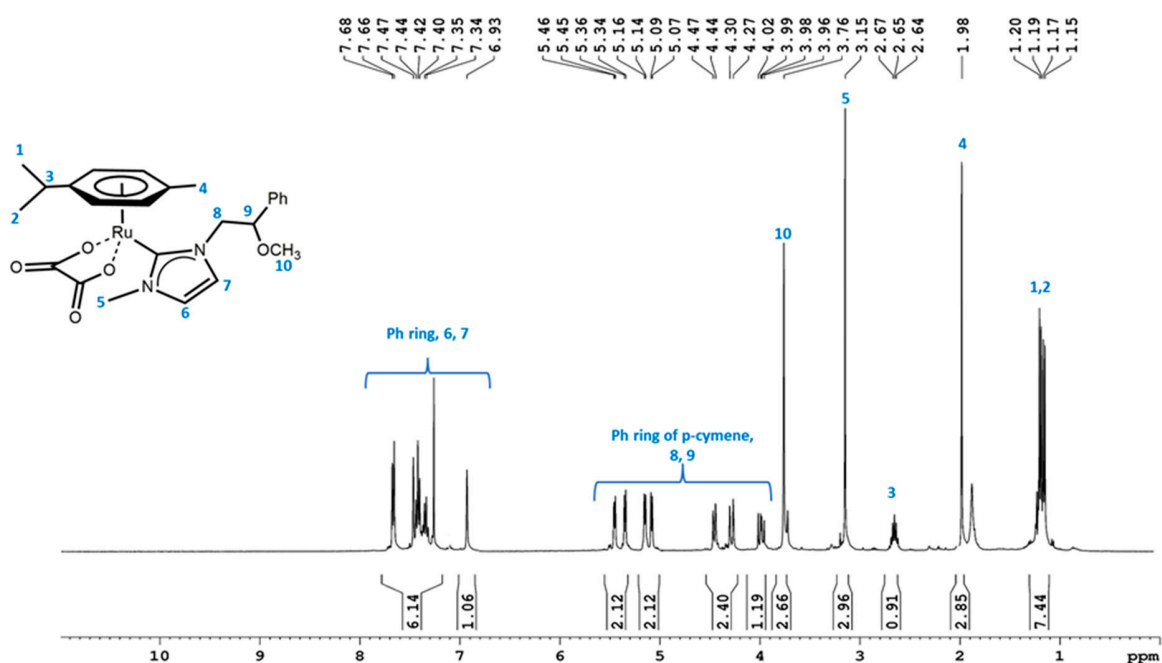

Figure S27: <sup>1</sup>H-NMR spectrum of RANHC-IV

<sup>1</sup>H-NMR (ppm, CDCl<sub>3</sub>, 400 MHz): δ 7.68-6.93 (m, aromatic hydrogens and NCHCHN, 7H), 5.46-5.34 (dd, aromatic hydrogens of *p*-cymene, 2H), 5.16-5.07 (dd, aromatic hydrogens of *p*-cymene, 2H), 4.47-4.27 (dd, NCH<sub>2</sub>CH, 2H), 3.98 (t, NCH<sub>2</sub>CH, 1H), 3.76 (s, OCH<sub>3</sub>, 3H), 3.15 (s, NCH<sub>3</sub>, 3H), 2.65 (m, CH(CH<sub>3</sub>)<sub>2</sub> *p*-cymene, 1H), 1.98 (s, CH<sub>3</sub> *p*-cymene, 3H), 1.18 (m, CH(CH<sub>3</sub>)<sub>2</sub> *p*-cymene, 6H).

### <sup>13</sup>C-NMR RANHC-IV

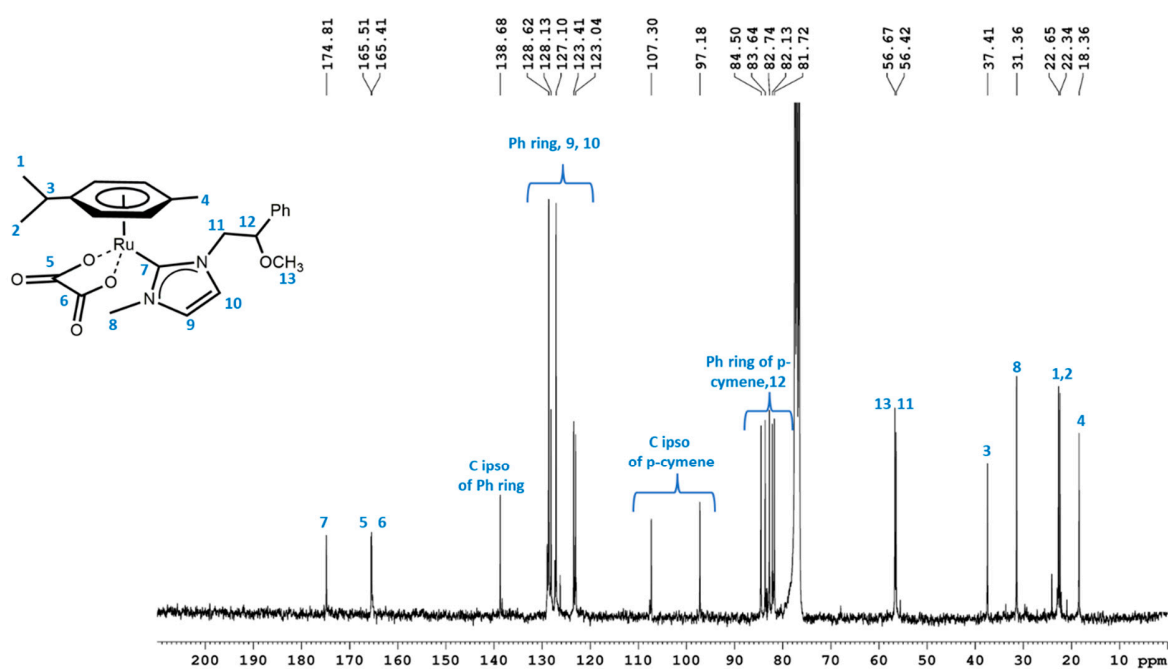

Figure S28: <sup>13</sup>C-NMR spectrum of RANHC-IV

<sup>13</sup>C-NMR (ppm, CDCl<sub>3</sub>, 62.5 MHz): δ 174.81 (NCN), 165.51, 165.41 (C=O, oxalyl group), 138.68 (ipso carbon of aromatic ring), 128.68, 128.13, 127.10 (aromatic carbons), 123.41, 123.04 (NCHCHN), 107.30, 97.18 (aromatic carbons p-cymene), 84.50 (NCH<sub>2</sub>CH), 83.64, 82.74, 82.13, 81.72 (aromatic carbons p-cymene), 56.67 (OCH<sub>3</sub>), 56.42 (NCH<sub>2</sub>CH), 37.41 (CH(CH<sub>3</sub>)<sub>2</sub> p-cymene), 31.36 (NCH<sub>3</sub>), 22.65, 22.34 (CH(CH<sub>3</sub>)<sub>2</sub> p-cymene), 18.36 (CH<sub>3</sub> p-cymene).

## ESI of RANHC-IV

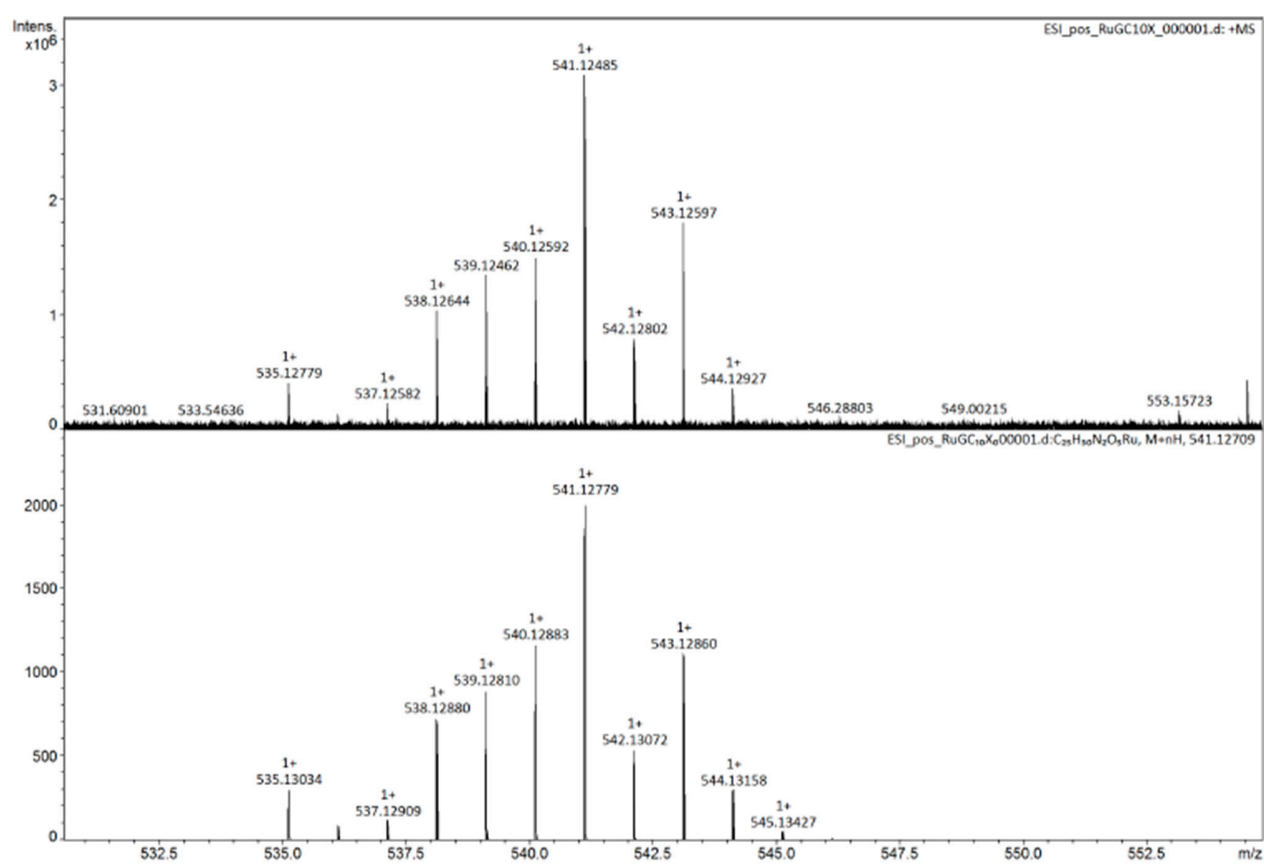

Figure S29: ESI of RANHC-IV

**Table S1:** Anticancer activity of the studied Ru-NHC complexes (**RANHC-I-VI**), expressed as IC<sub>50</sub> values  $\pm$  S.D.  $\mu$ M and  $\mu$ g/mL, against different cell lines.

| Compounds        | IC <sub>50</sub> |                 |                 |                 |                 |                 |                 |                 |                 |                 |
|------------------|------------------|-----------------|-----------------|-----------------|-----------------|-----------------|-----------------|-----------------|-----------------|-----------------|
|                  | MDA-MB-231       |                 | MCF-7           |                 | SH-SY5Y         |                 | MCF-10A         |                 | BALB/3T3        |                 |
|                  | $\mu$ M          | $\mu$ g/mL      | $\mu$ M         | $\mu$ g/mL      | $\mu$ M         | $\mu$ g/mL      | $\mu$ M         | $\mu$ g/mL      | $\mu$ M         | $\mu$ g/mL      |
| <b>RANHC-I</b>   | >100             | >52.25          | >100            | >52.25          | 90.05 $\pm$ 0.9 | 47.05 $\pm$ 0.9 | >100            | >52.25          | >100            | >52.25          |
| <b>RANHC-II</b>  | >100             | >70.54          | >100            | >70.54          | >100            | >70.54          | >100            | >70.54          | >100            | >70.54          |
| <b>RANHC-III</b> | >100             | >63.20          | >100            | >63.20          | >100            | >63.20          | >100            | >63.20          | >100            | >63.20          |
| <b>RANHC-IV</b>  | >100             | >53.96          | >100            | >53.96          | 88.89 $\pm$ 0.9 | 47.96 $\pm$ 0.9 | >100            | >53.96          | >100            | >53.96          |
| <b>RANHC-V</b>   | 24.14 $\pm$ 0.7  | 14.28 $\pm$ 0.7 | 26.05 $\pm$ 0.9 | 15.41 $\pm$ 0.9 | 48.43 $\pm$ 0.8 | 28.64 $\pm$ 0.8 | 79.47 $\pm$ 1.2 | 46.99 $\pm$ 1.2 | >100            | >59.14          |
| <b>RANHC-VI</b>  | 40.57 $\pm$ 1.1  | 23.23 $\pm$ 1.1 | 54.75 $\pm$ 1.1 | 31.35 $\pm$ 1.1 | 66.86 $\pm$ 0.8 | 38.28 $\pm$ 0.8 | 90.72 $\pm$ 1.2 | 51.94 $\pm$ 1.2 | 39.09 $\pm$ 1.1 | 22.38 $\pm$ 1.1 |
| <b>Cisplatin</b> | 32.15 $\pm$ 1.0  | 9.68 $\pm$ 1.0  | 26.19 $\pm$ 1.1 | 7.89 $\pm$ 1.1  | 18.75 $\pm$ 0.9 | 5.65 $\pm$ 0.9  | 80.24 $\pm$ 0.8 | 24.16 $\pm$ 0.8 | 21.57 $\pm$ 1.2 | 6.49 $\pm$ 1.2  |

**Table S2.** MIC results of the Ru-NHC complexes (**RANHC-I-VI**), expressed in  $\mu$ M and  $\mu$ g/mL.

| Ru-NHC complexes | M.I.C. [a]                    |            |                                 |            |                                   |            |
|------------------|-------------------------------|------------|---------------------------------|------------|-----------------------------------|------------|
|                  | <i>E. coli</i> <sup>[b]</sup> |            | <i>S. aureus</i> <sup>[b]</sup> |            | <i>E. faecalis</i> <sup>[b]</sup> |            |
|                  | $\mu$ M                       | $\mu$ g/mL | $\mu$ M                         | $\mu$ g/mL | $\mu$ M                           | $\mu$ g/mL |
| <b>RANHC-I</b>   | 95.70                         | 50         | 47.85                           | 25         | 95.70                             | 50         |
| <b>RANHC-II</b>  | 70.88                         | 50         | 35.44                           | 25         | 70.88                             | 50         |
| <b>RANHC-III</b> | 39.56                         | 25         | 39.56                           | 25         | 79.12                             | 50         |
| <b>RANHC-IV</b>  | 92.66                         | 50         | 46.33                           | 25         | 92.66                             | 50         |
| <b>RANHC-V</b>   | 84.55                         | 50         | 42.27                           | 25         | 118.37                            | 70         |
| <b>RANHC-VI</b>  | 43.67                         | 25         | 43.67                           | 25         | 87.33                             | 50         |

**Table S3.** Radical scavenging ability against DPPH and ABTS radicals, expressed as  $IC_{50} \pm SD$   $\mu M$  and  $\mu g/mL$ , of Ru-NHC complexes and standard drug (Trolox).

| Compounds        | $IC_{50}$       |                 |                 |                  |
|------------------|-----------------|-----------------|-----------------|------------------|
|                  | ABTS            |                 | DPPH            |                  |
|                  | $\mu M$         | $\mu g/mL$      | $\mu M$         | $\mu g/mL$       |
| <b>RANHC-I</b>   | 13.52 $\pm$ 0.7 | 7.06 $\pm$ 0.7  | 369.6 $\pm$ 1.1 | 193.11 $\pm$ 1.1 |
| <b>RANHC-II</b>  | 16.05 $\pm$ 0.7 | 11.32 $\pm$ 0.7 | 214.8 $\pm$ 1.1 | 151.52 $\pm$ 1.1 |
| <b>RANHC-III</b> | 5.53 $\pm$ 1.1  | 3.49 $\pm$ 1.1  | 44.19 $\pm$ 1.2 | 27.93 $\pm$ 1.2  |
| <b>RANHC-IV</b>  | 8.57 $\pm$ 1.1  | 4.62 $\pm$ 1.1  | 512.3 $\pm$ 0.8 | 276.43 $\pm$ 0.8 |
| <b>RANHC-V</b>   | 11.36 $\pm$ 0.8 | 6.72 $\pm$ 0.8  | 246.2 $\pm$ 1.2 | 145.60 $\pm$ 1.2 |
| <b>RANHC-VI</b>  | 17.21 $\pm$ 1.1 | 9.85 $\pm$ 1.1  | 161.6 $\pm$ 1.0 | 92.52 $\pm$ 1.0  |
| <b>Trolox</b>    | 92.30 $\pm$ 0.9 | 23.10 $\pm$ 0.9 | 99.91 $\pm$ 0.9 | 25.01 $\pm$ 0.9  |
